# Supplementary material for: Single-cell sequencing reveals the evolution of immune molecules across multiple vertebrate species
Source: PubMed Central journal article supplement — J Adv Res. 2023 Mar 4;55:73–87. doi: 10.1016/j.jare.2023.02.017 (PMC10770119; doi:10.1016/j.jare.2023.02.017), 2023-03-04

A

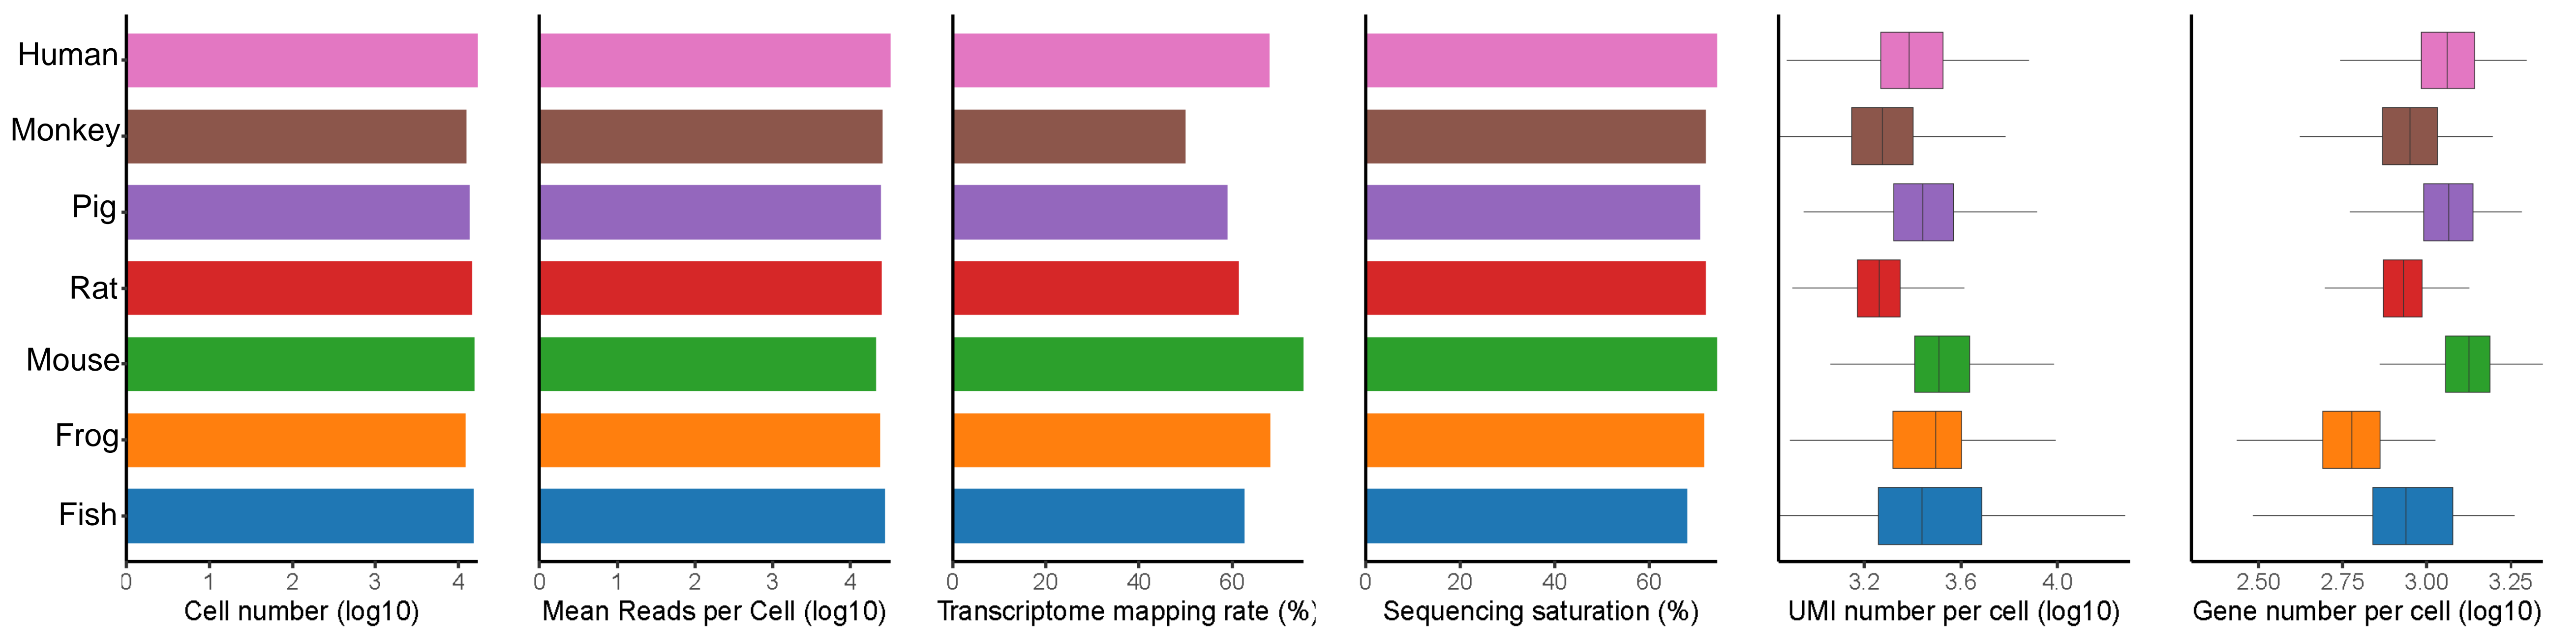

B

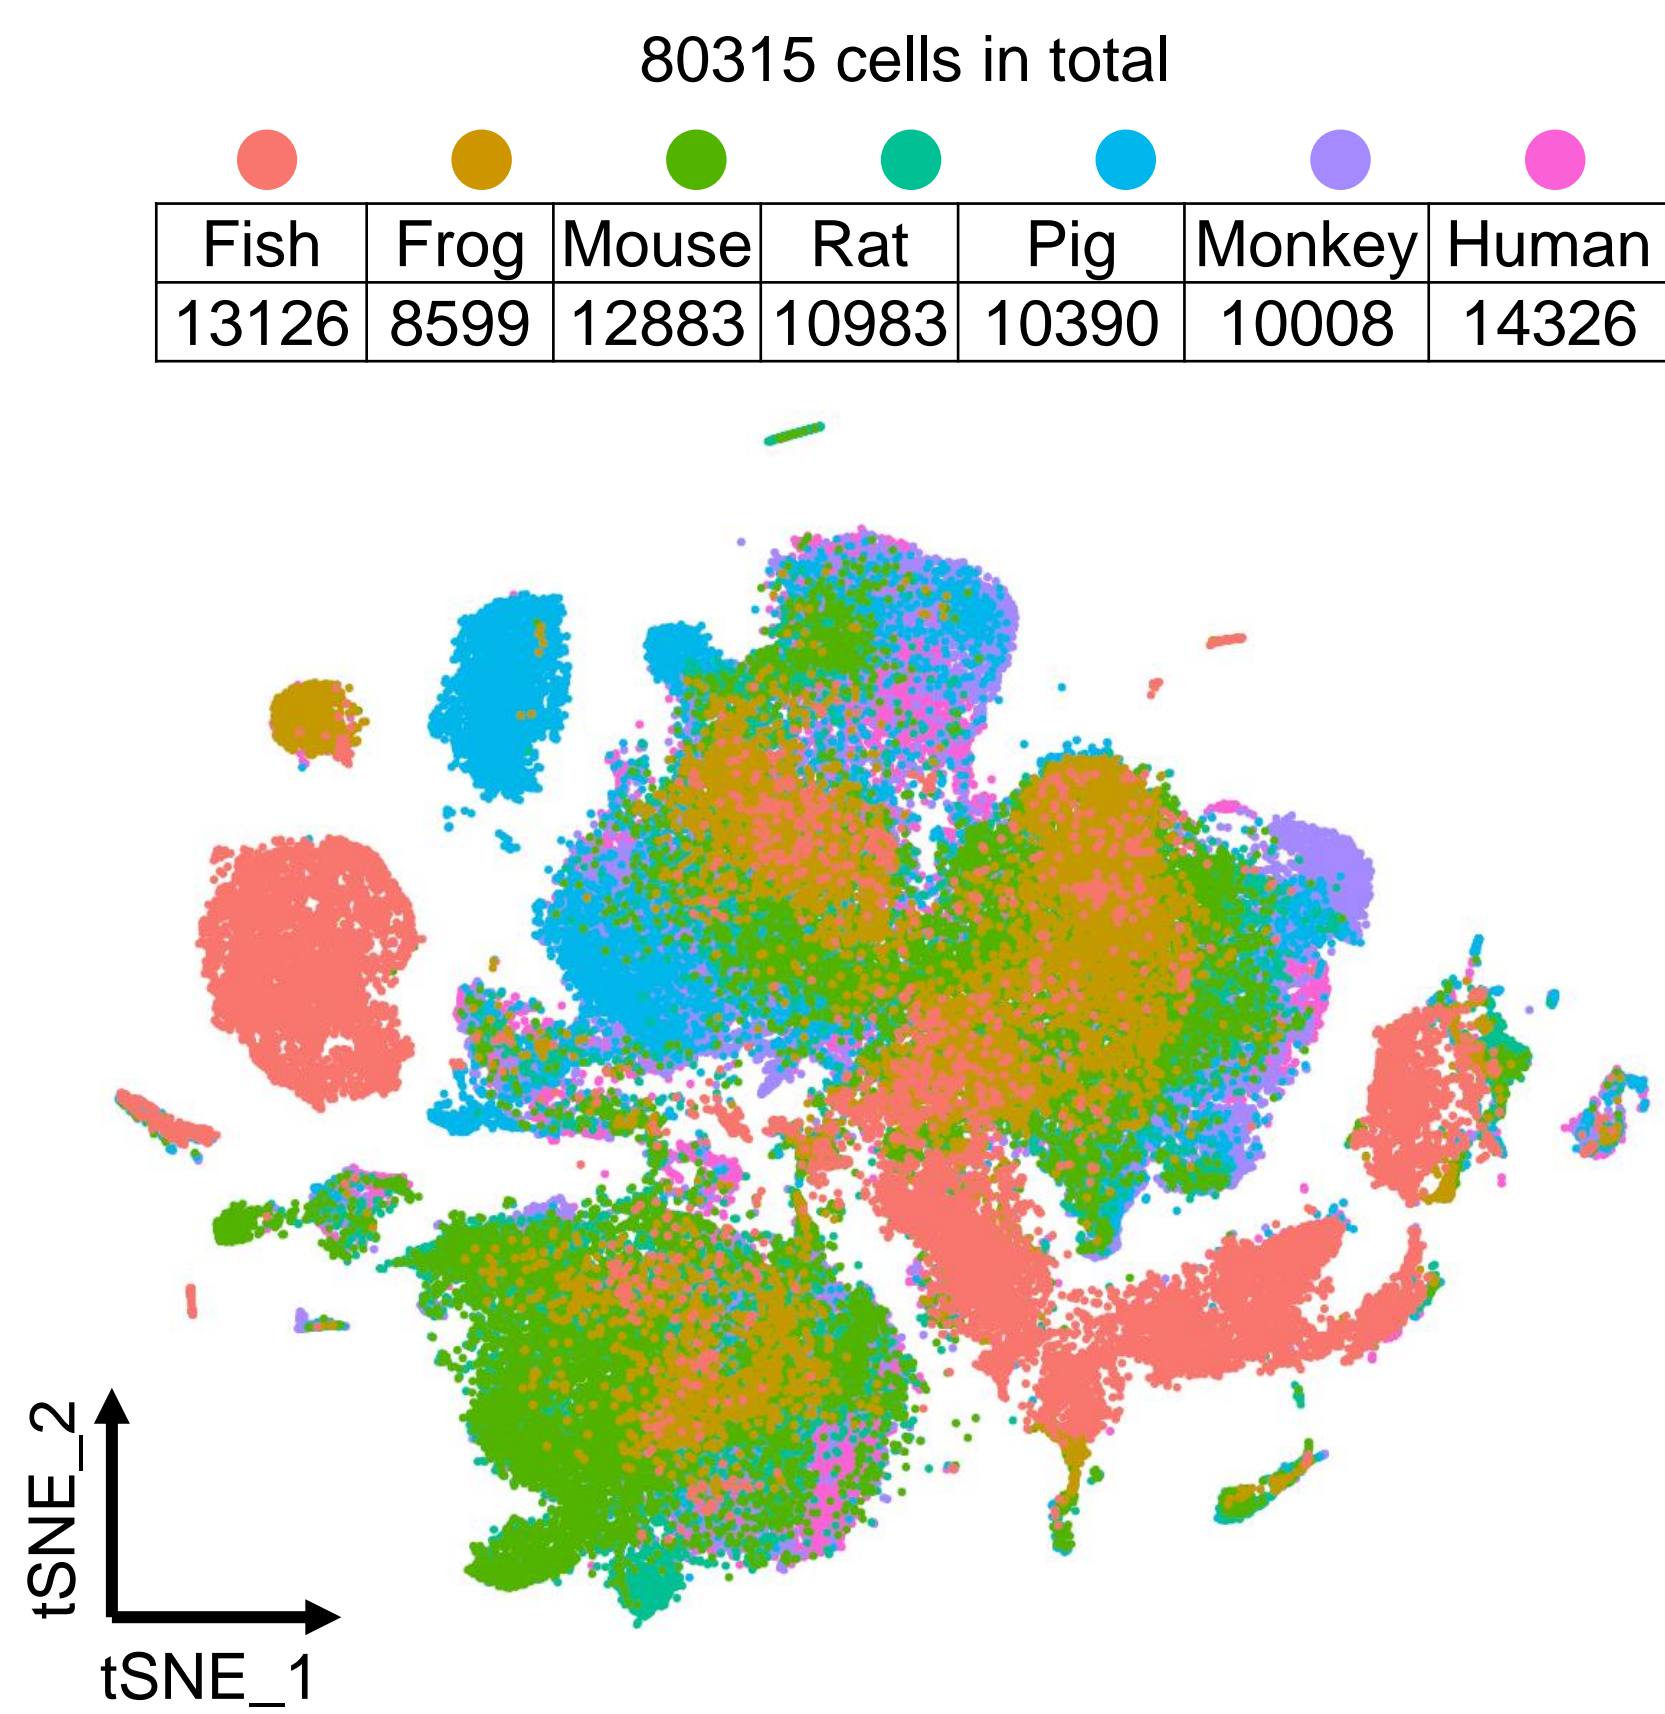

C

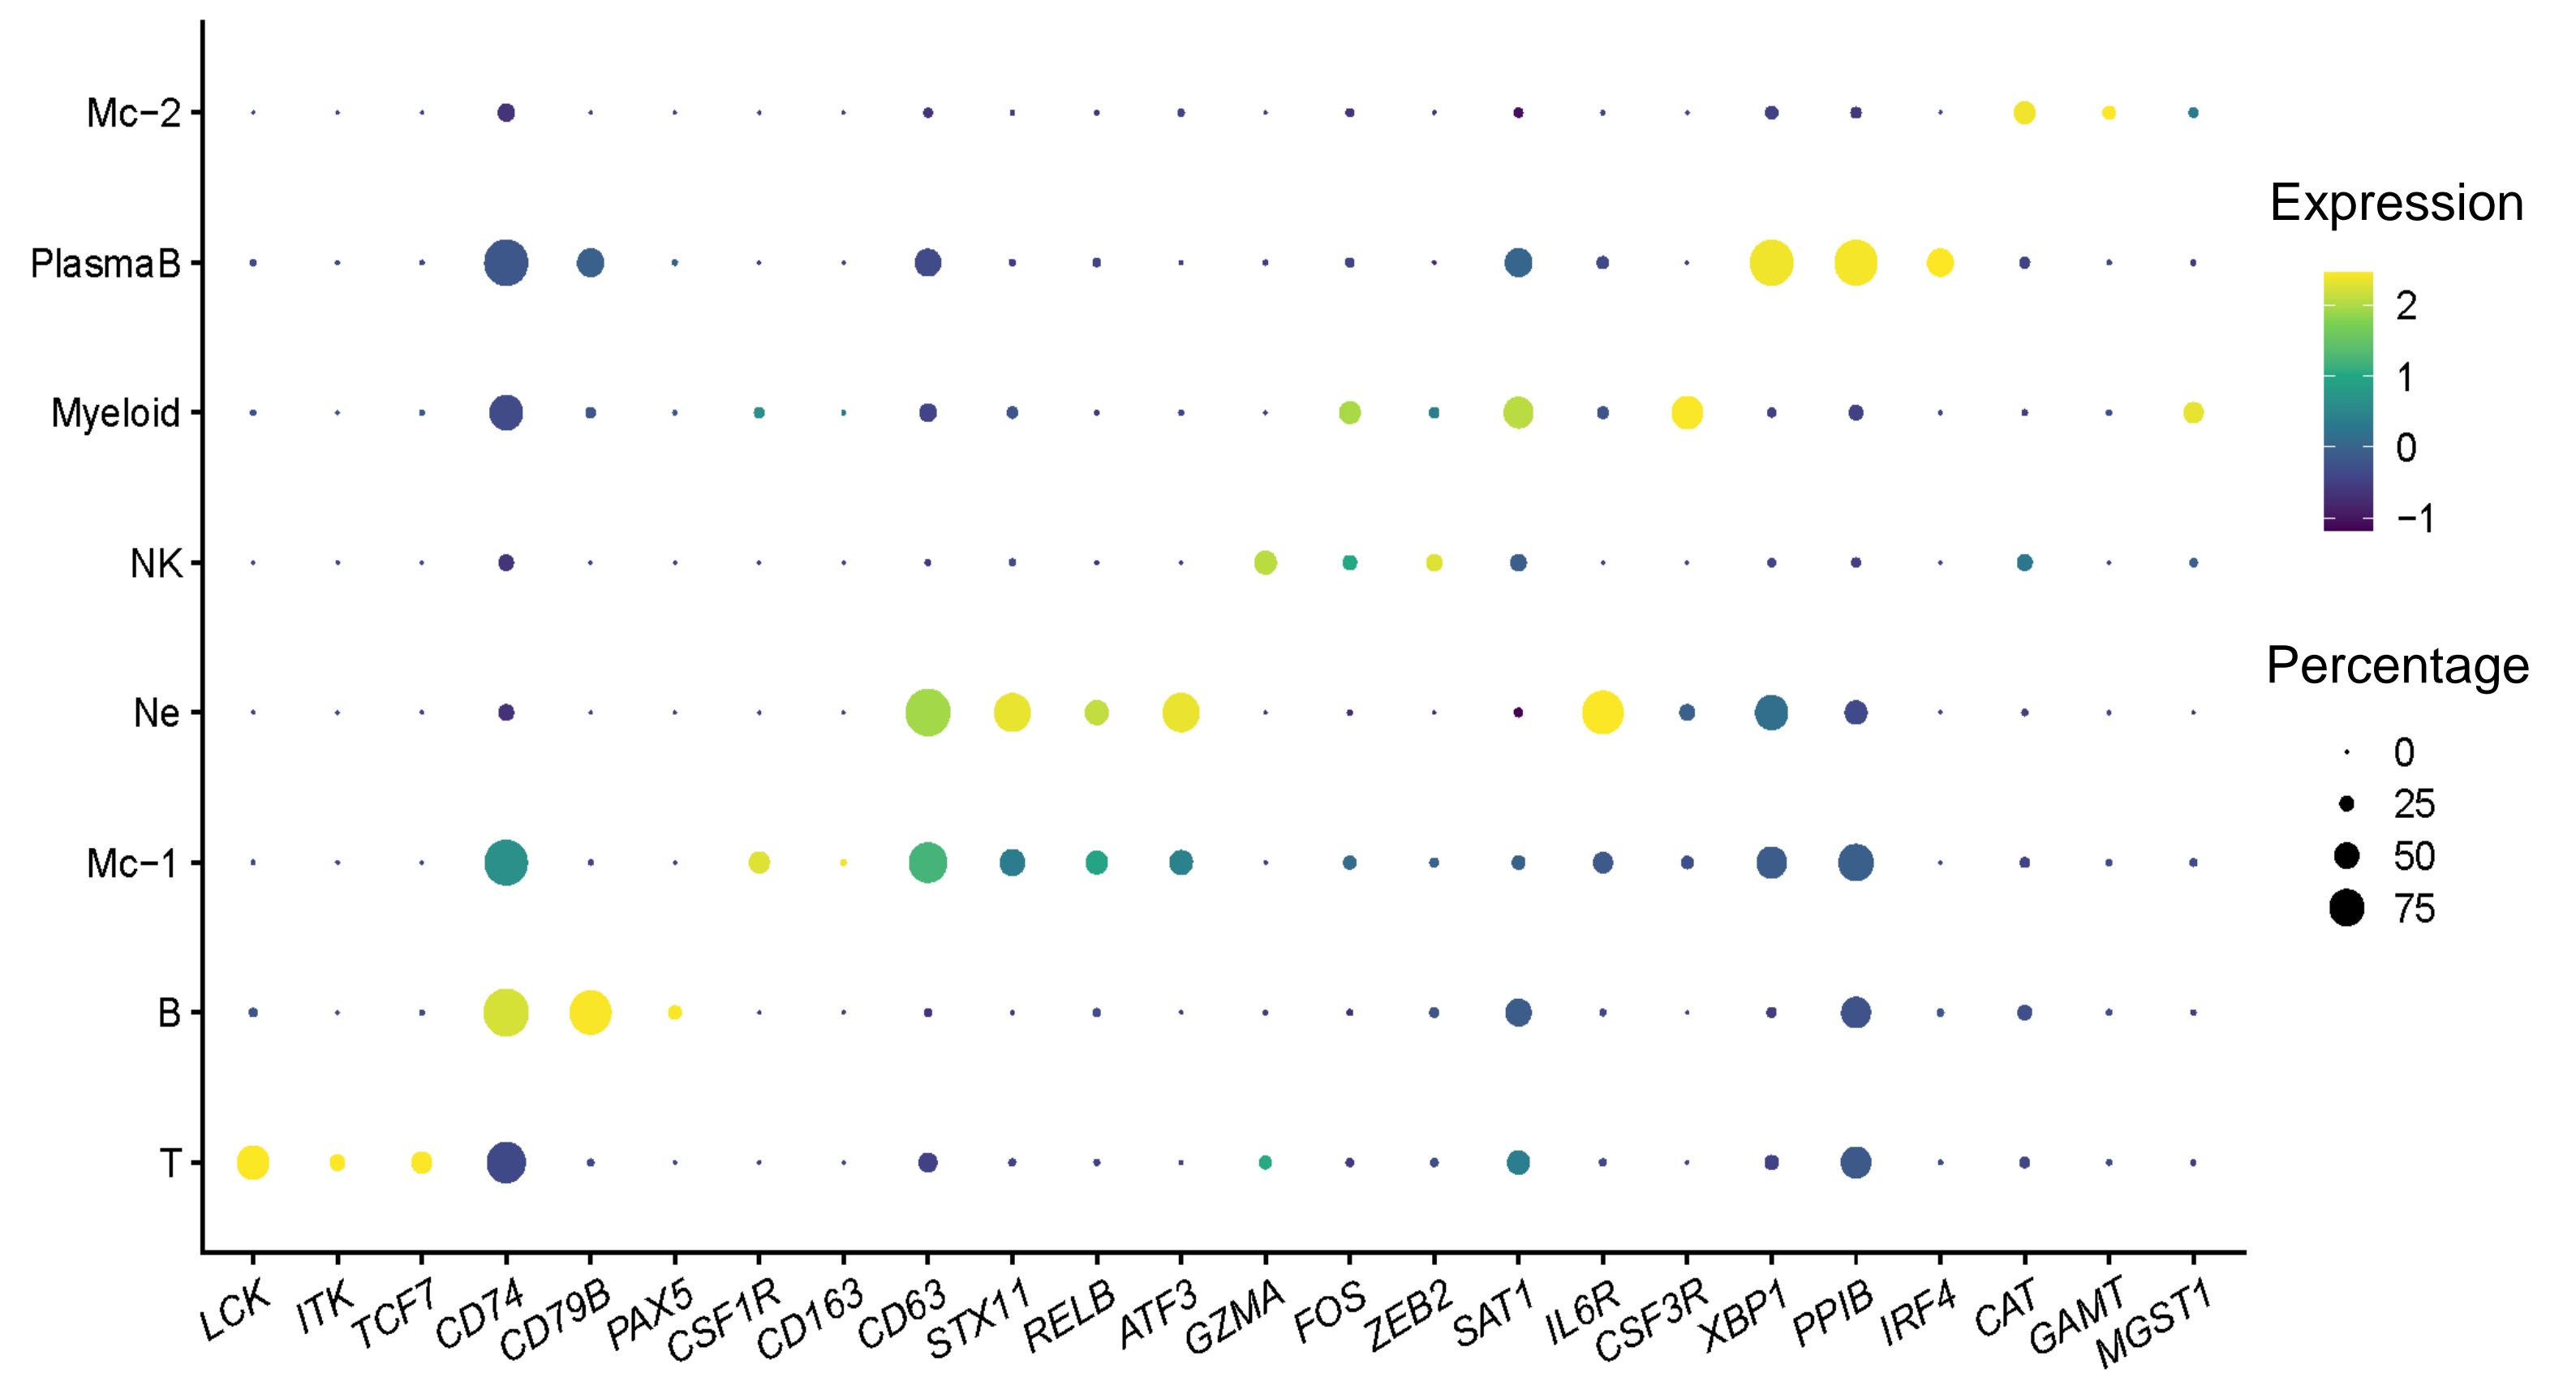

D

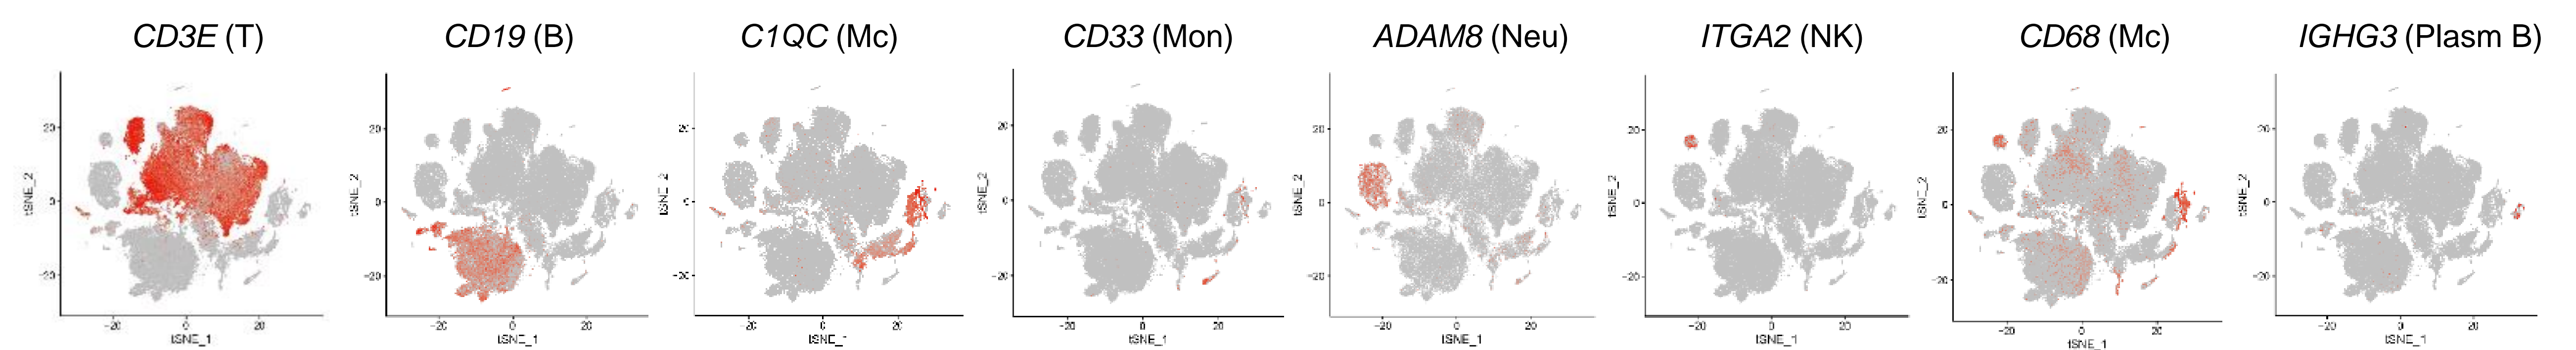

E

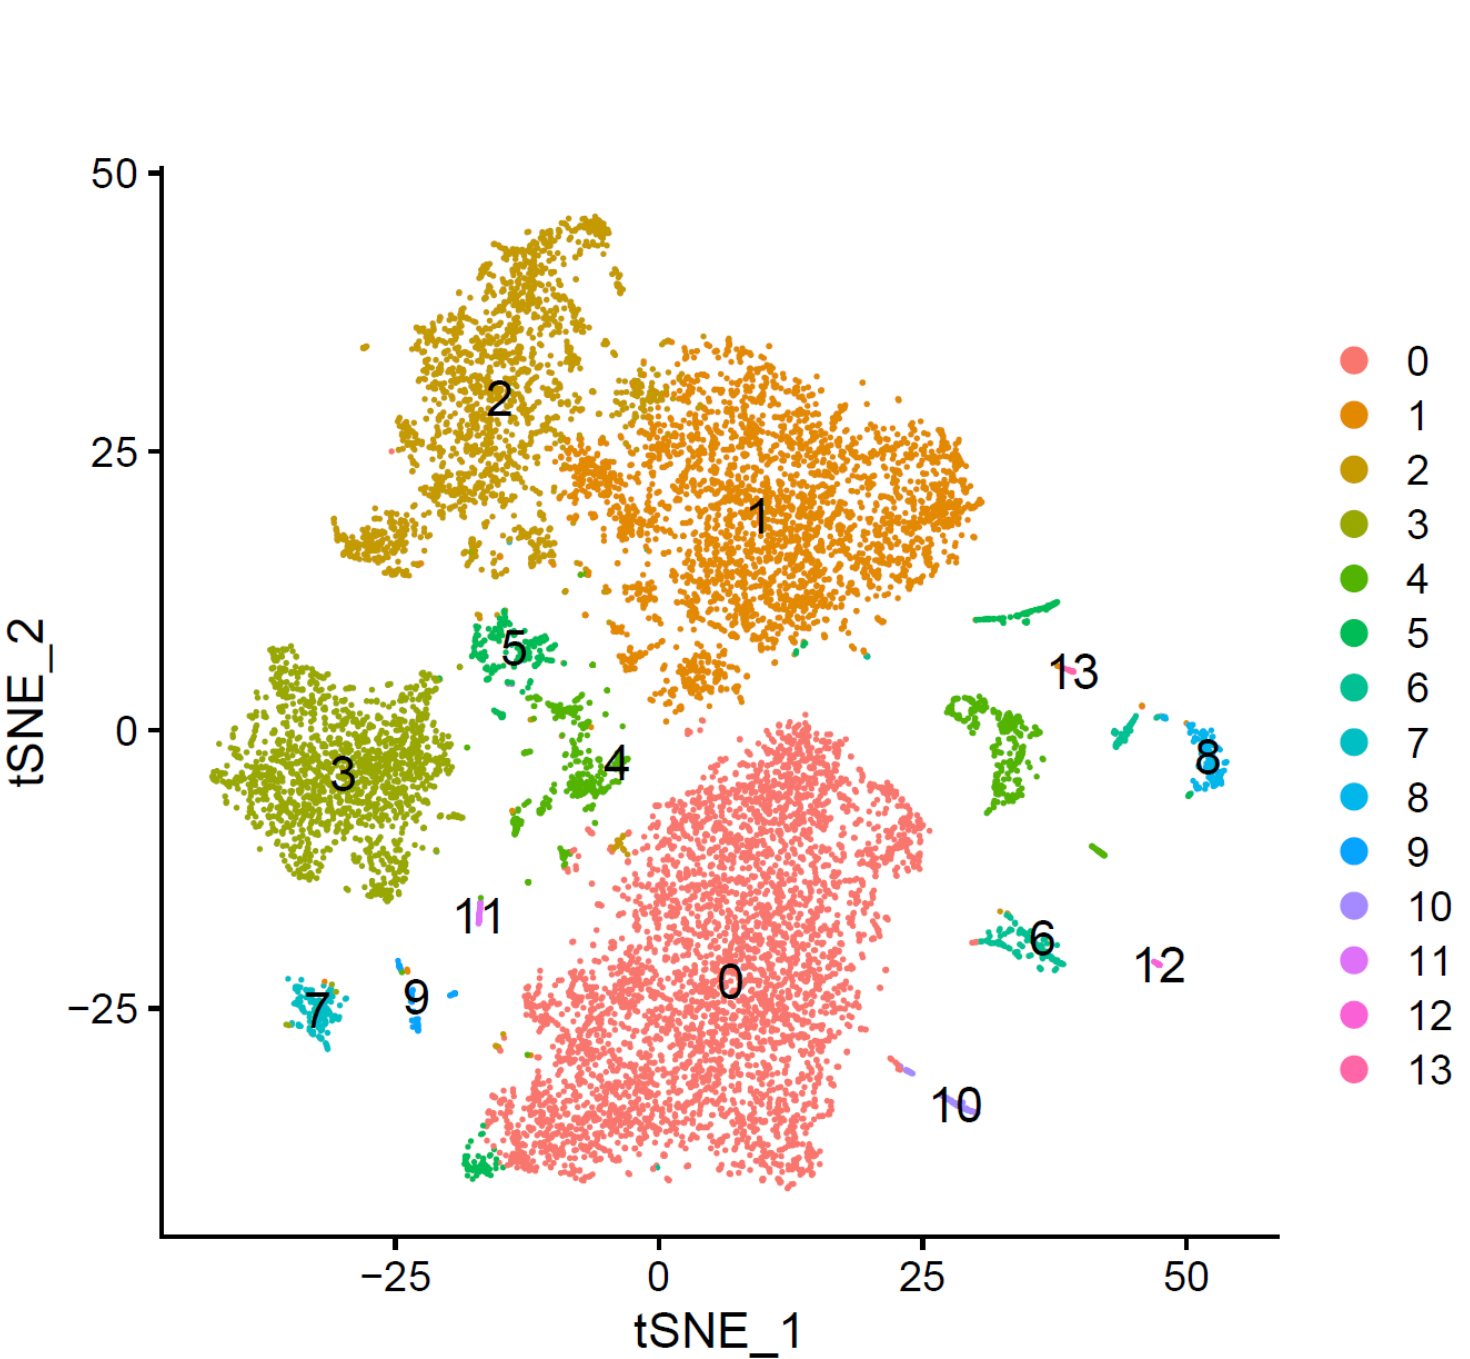

F

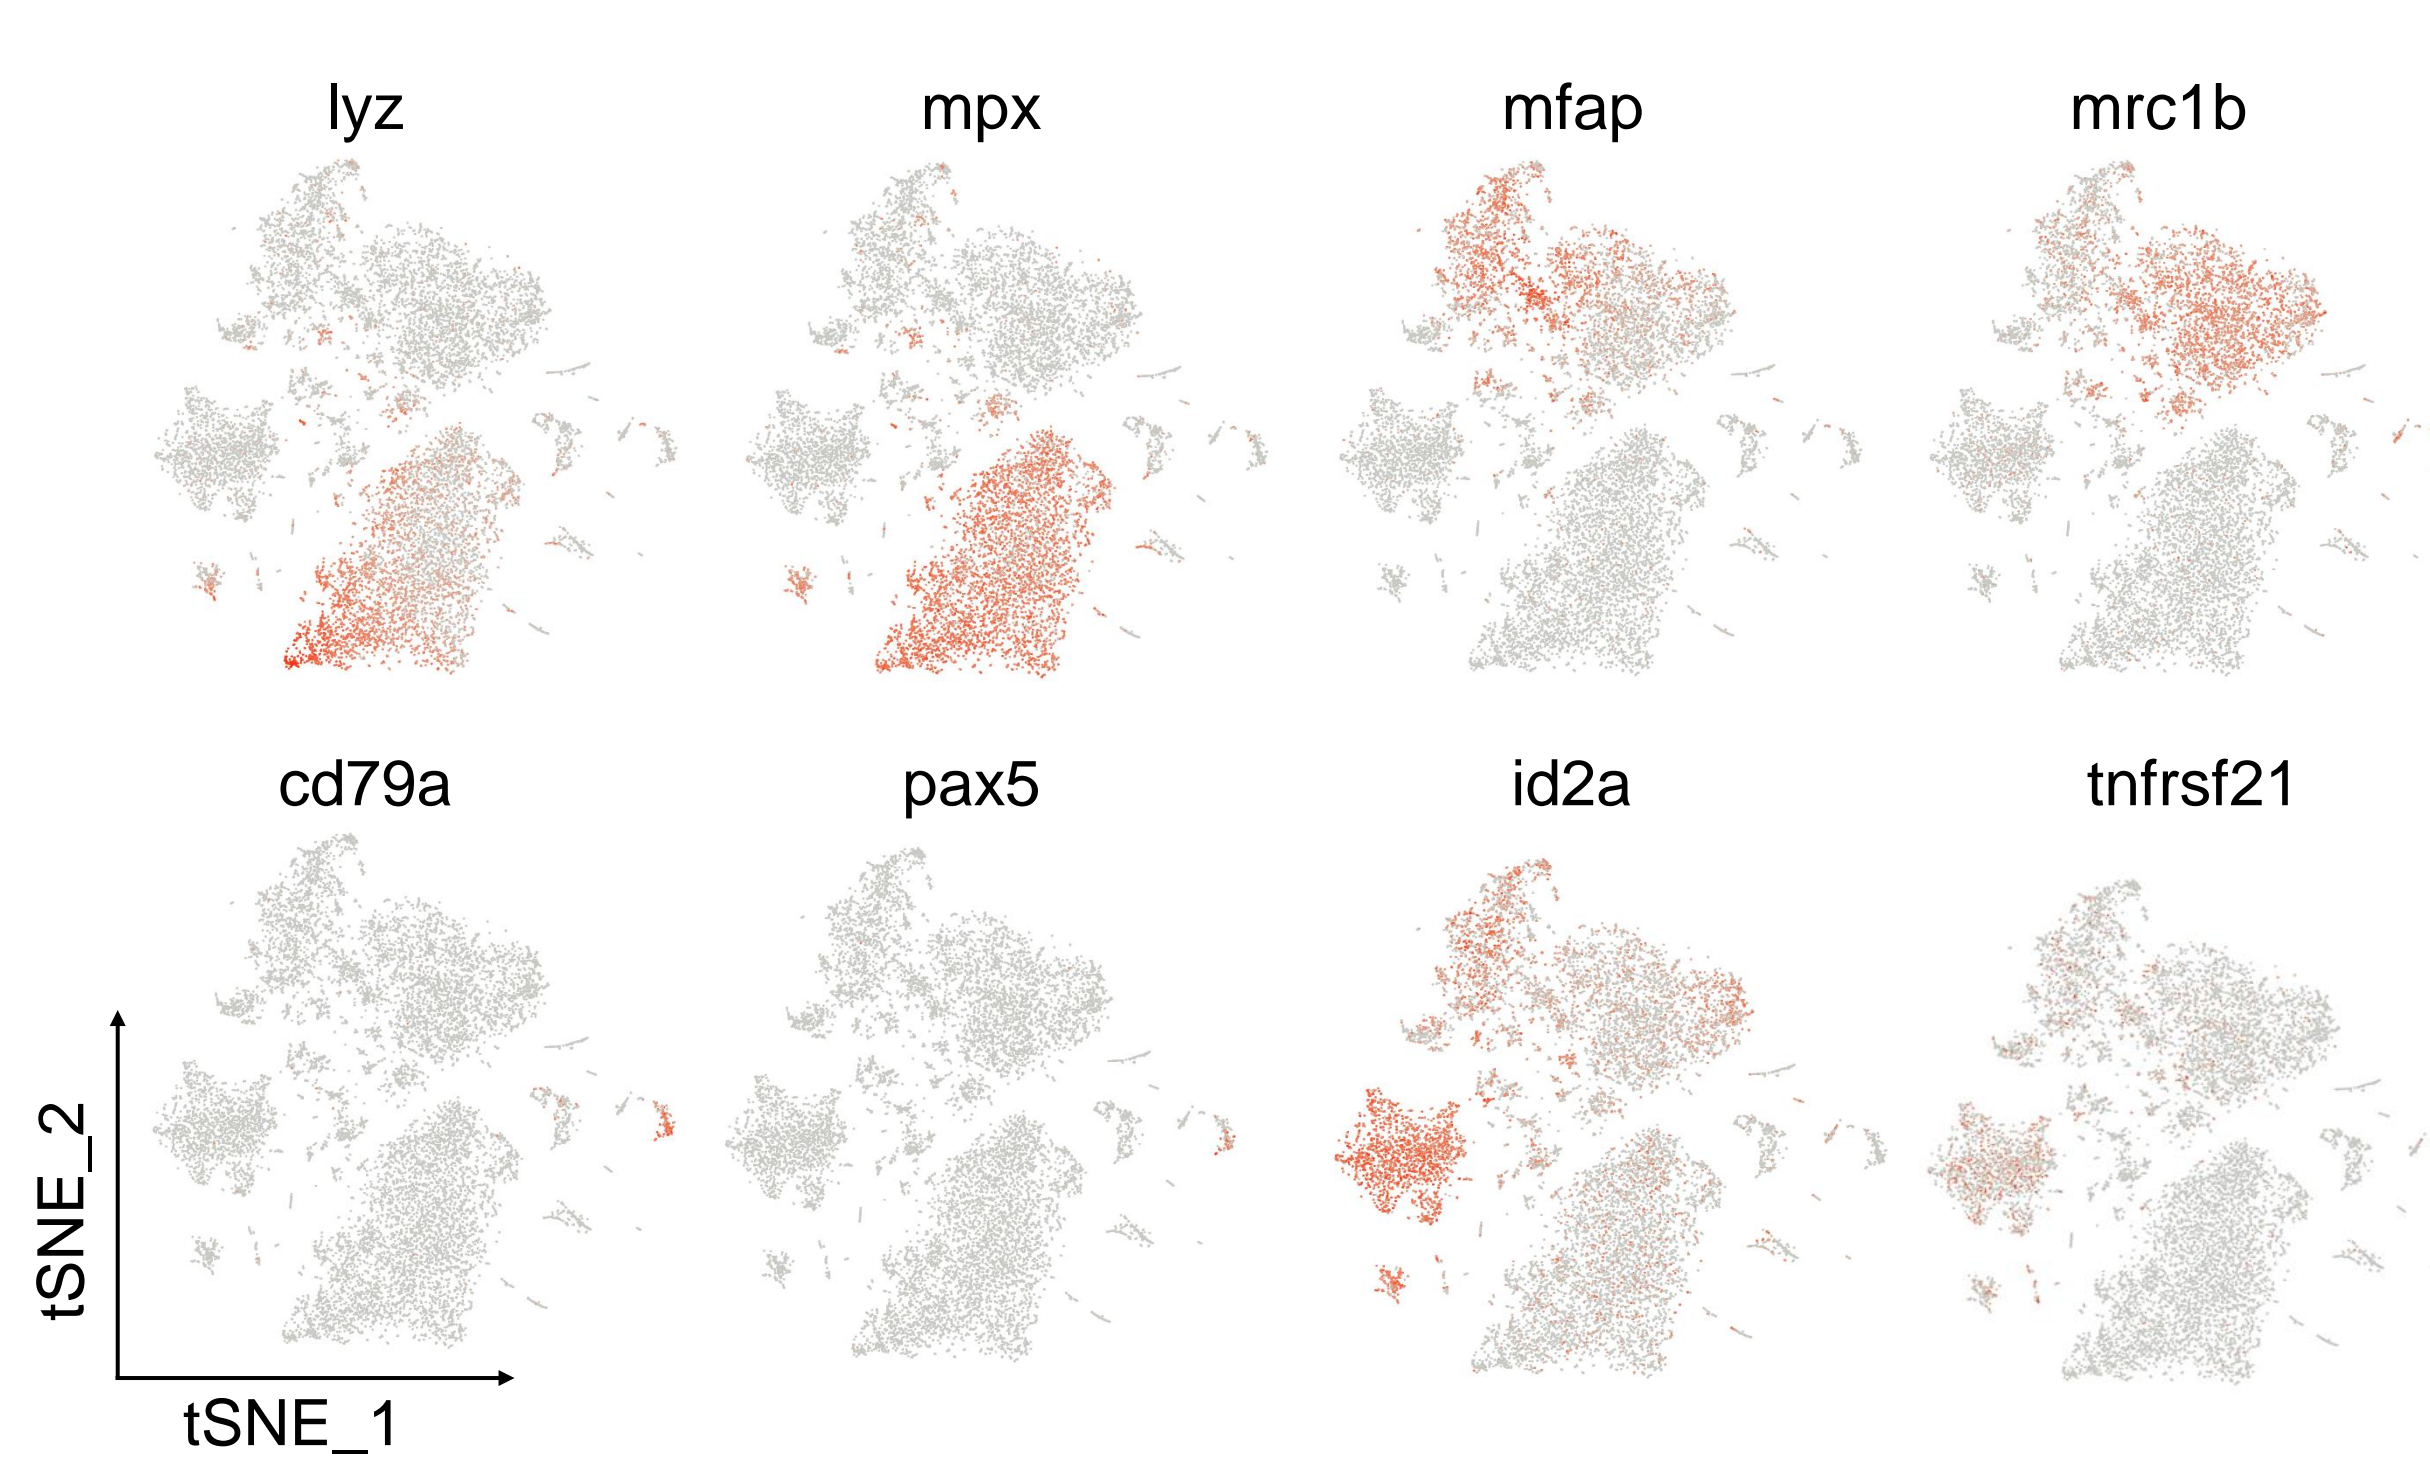

G

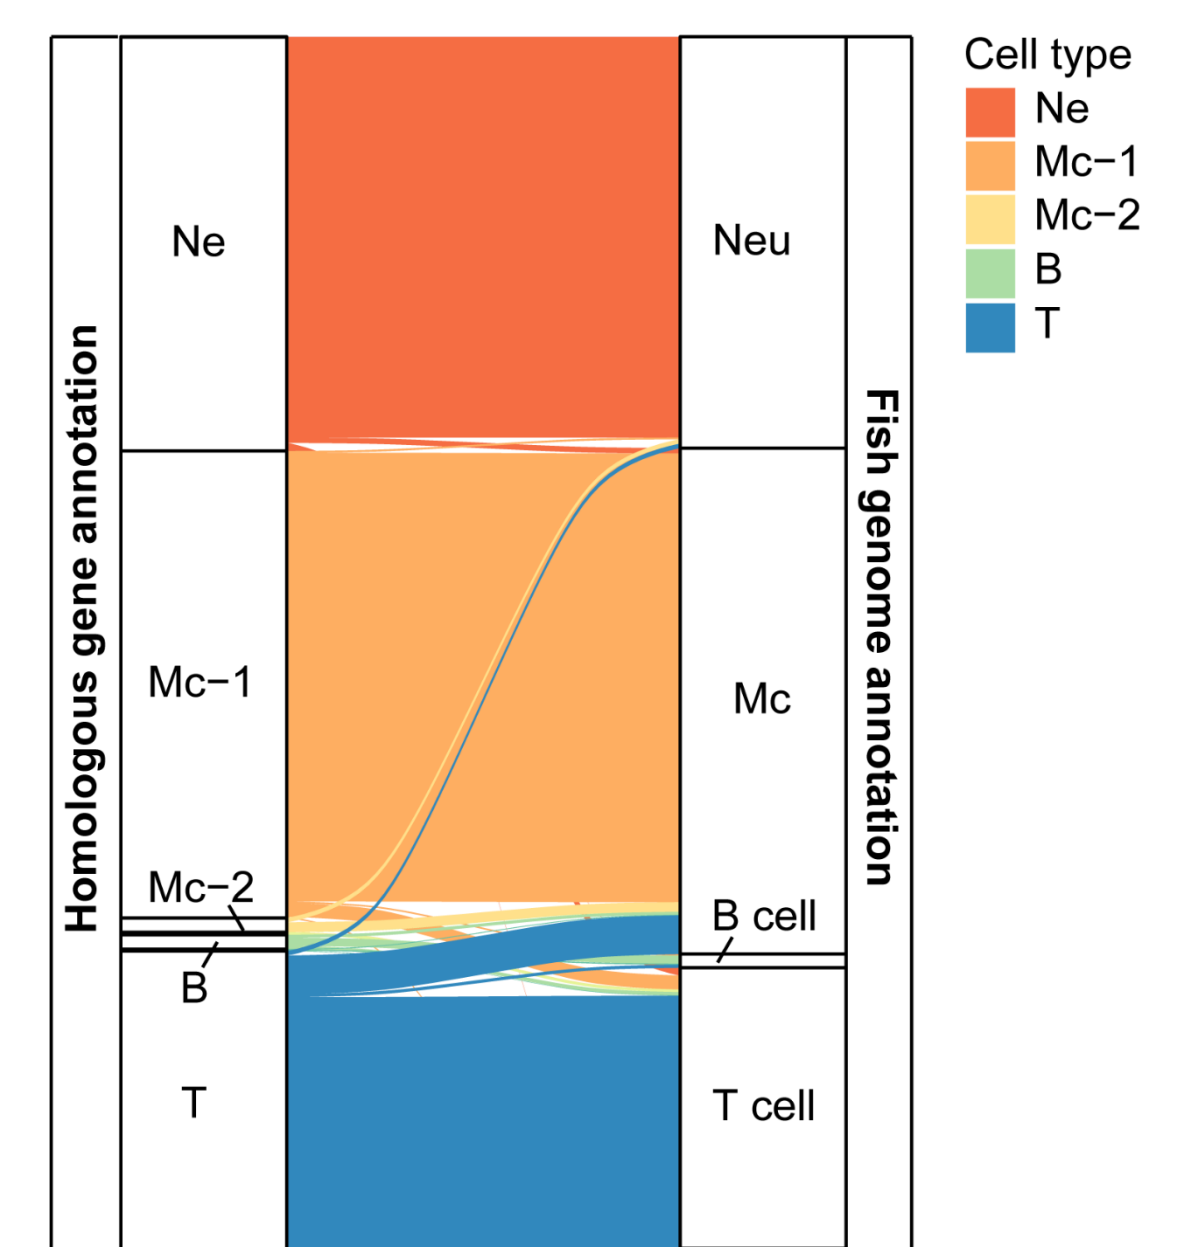

H

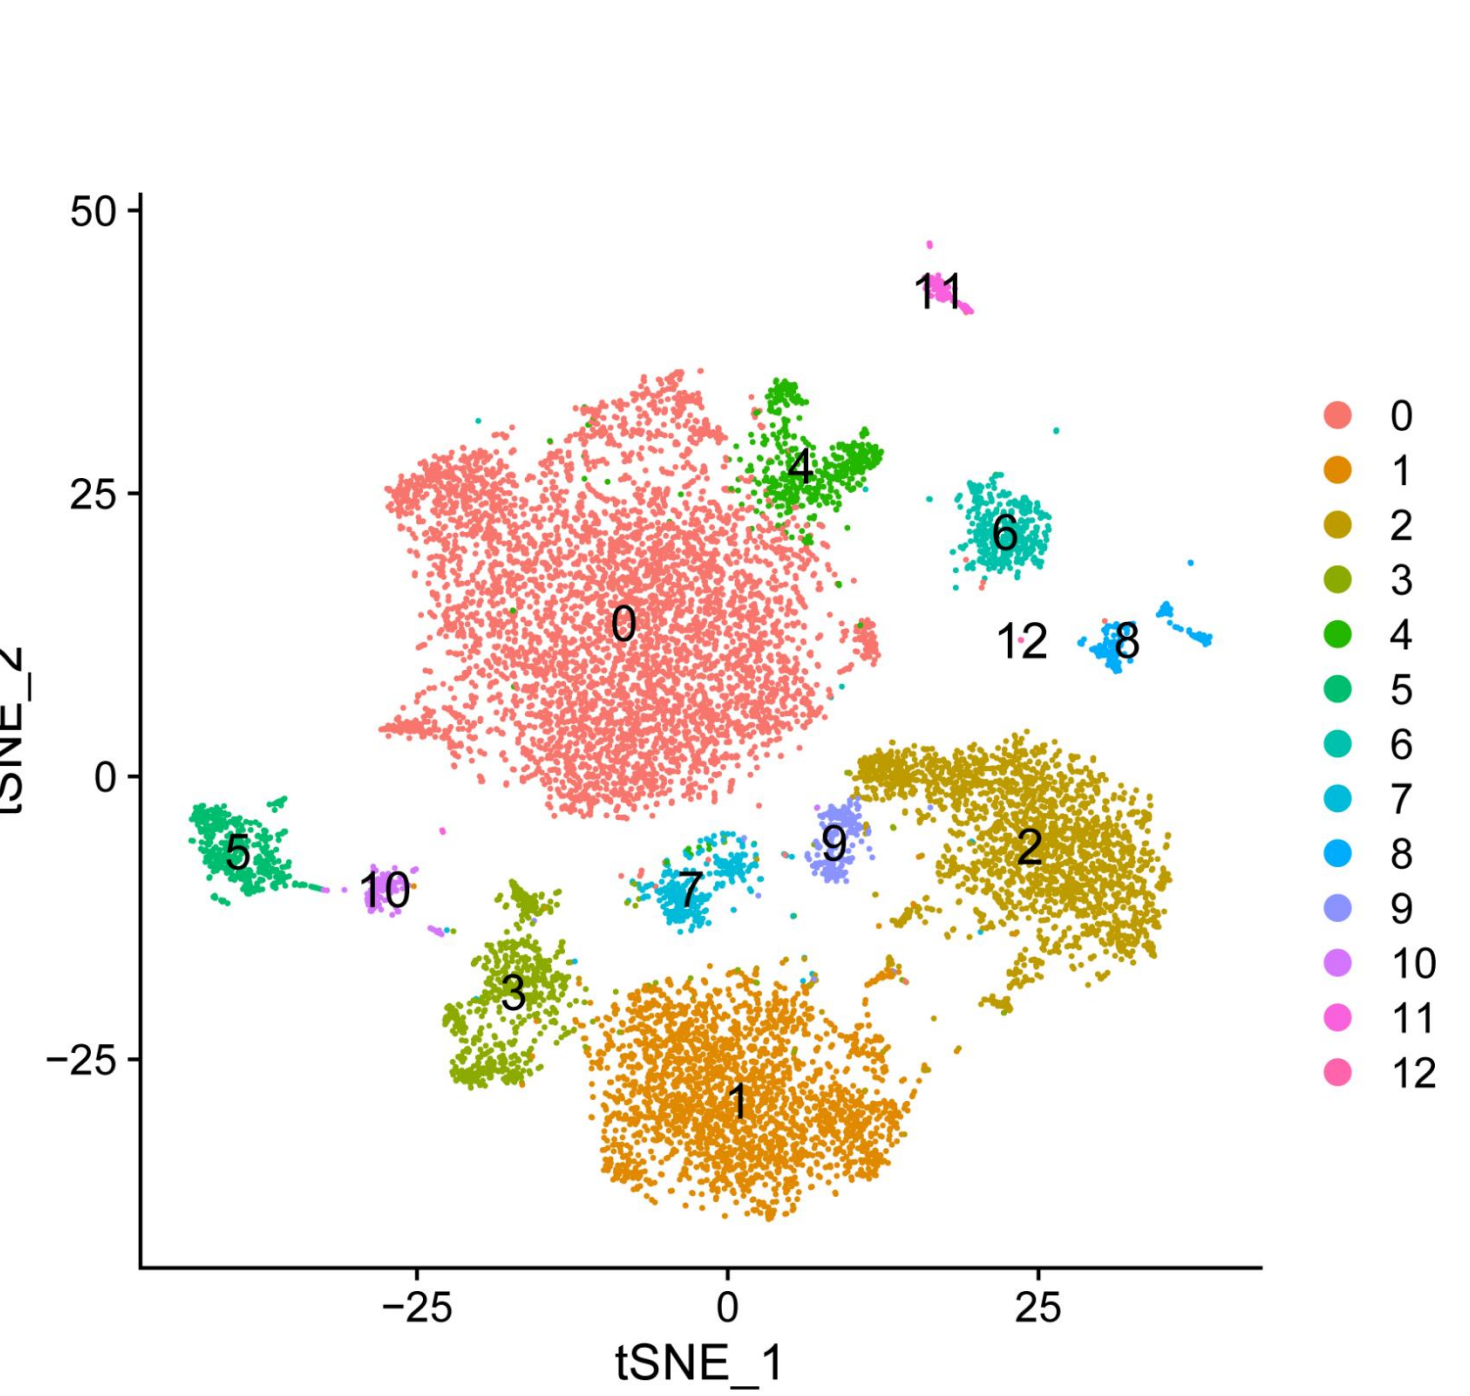

I

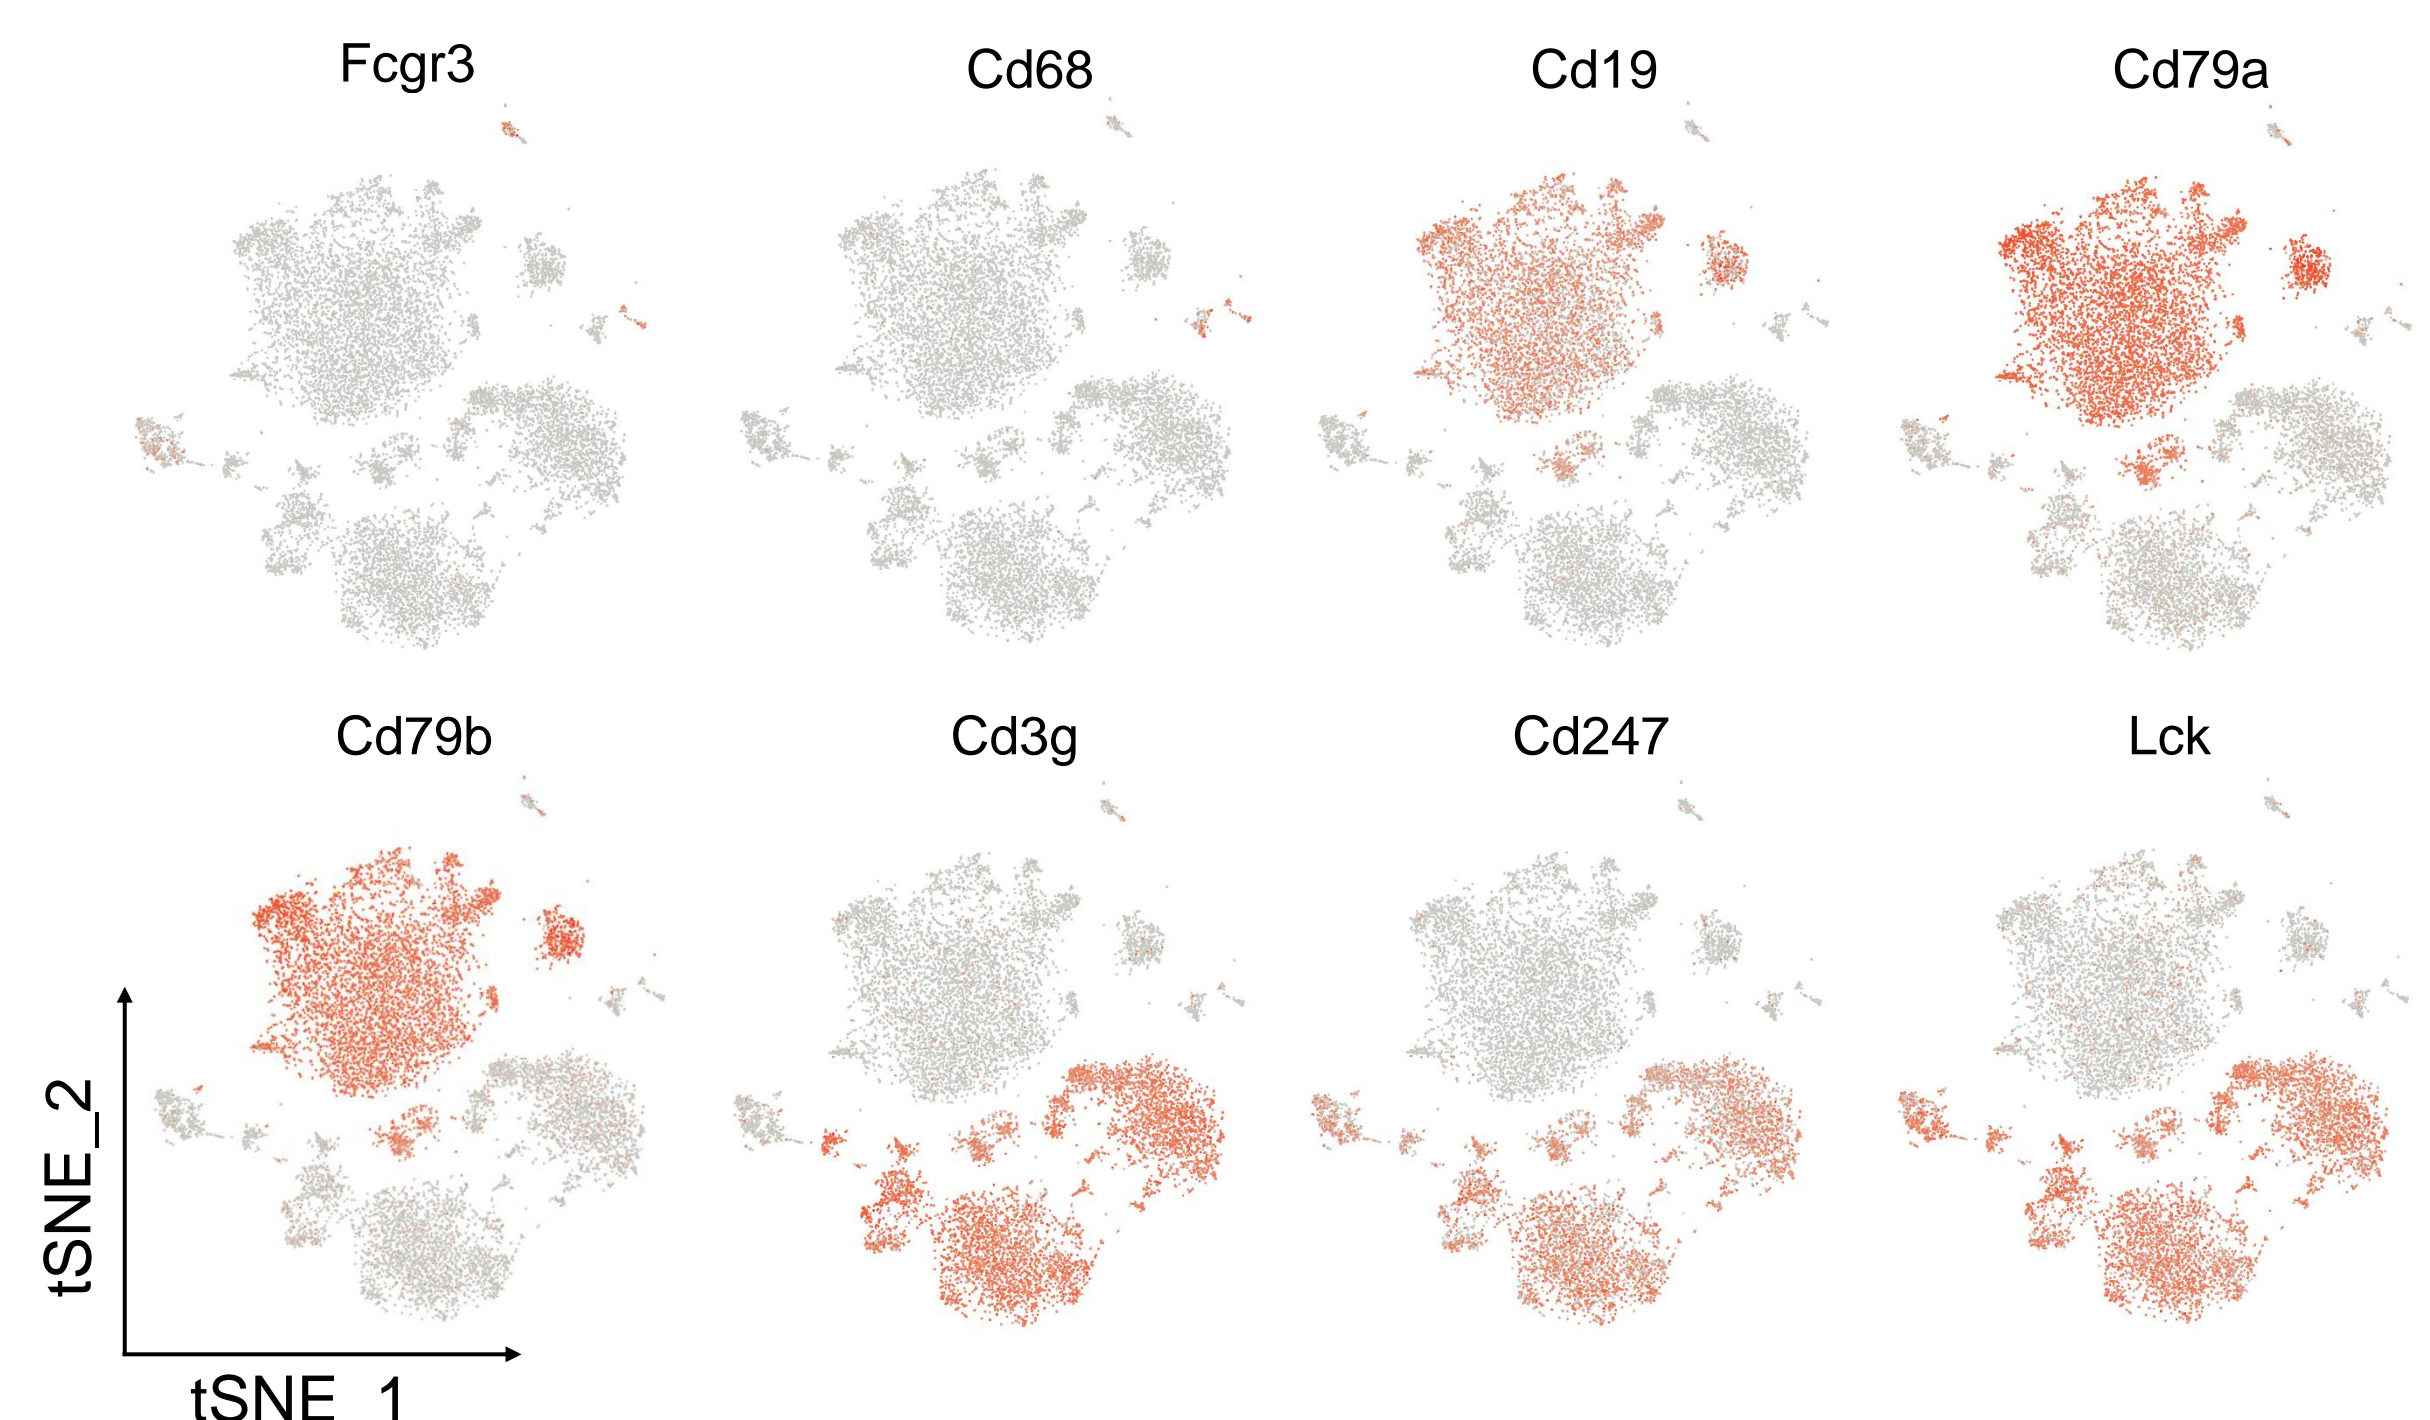

J

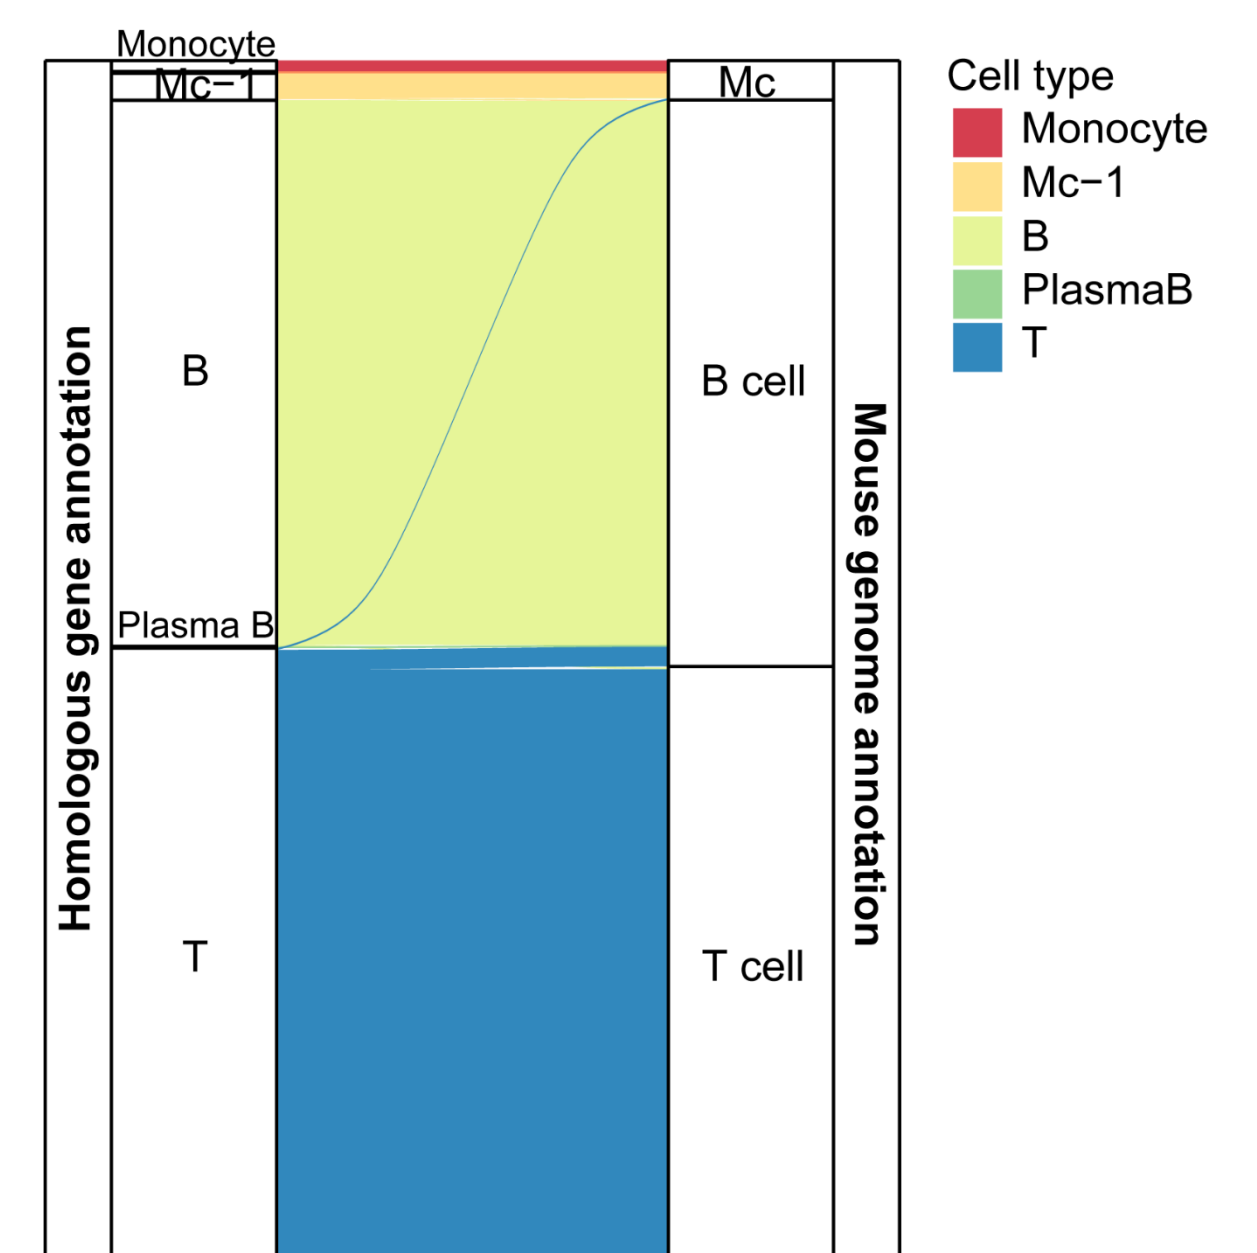

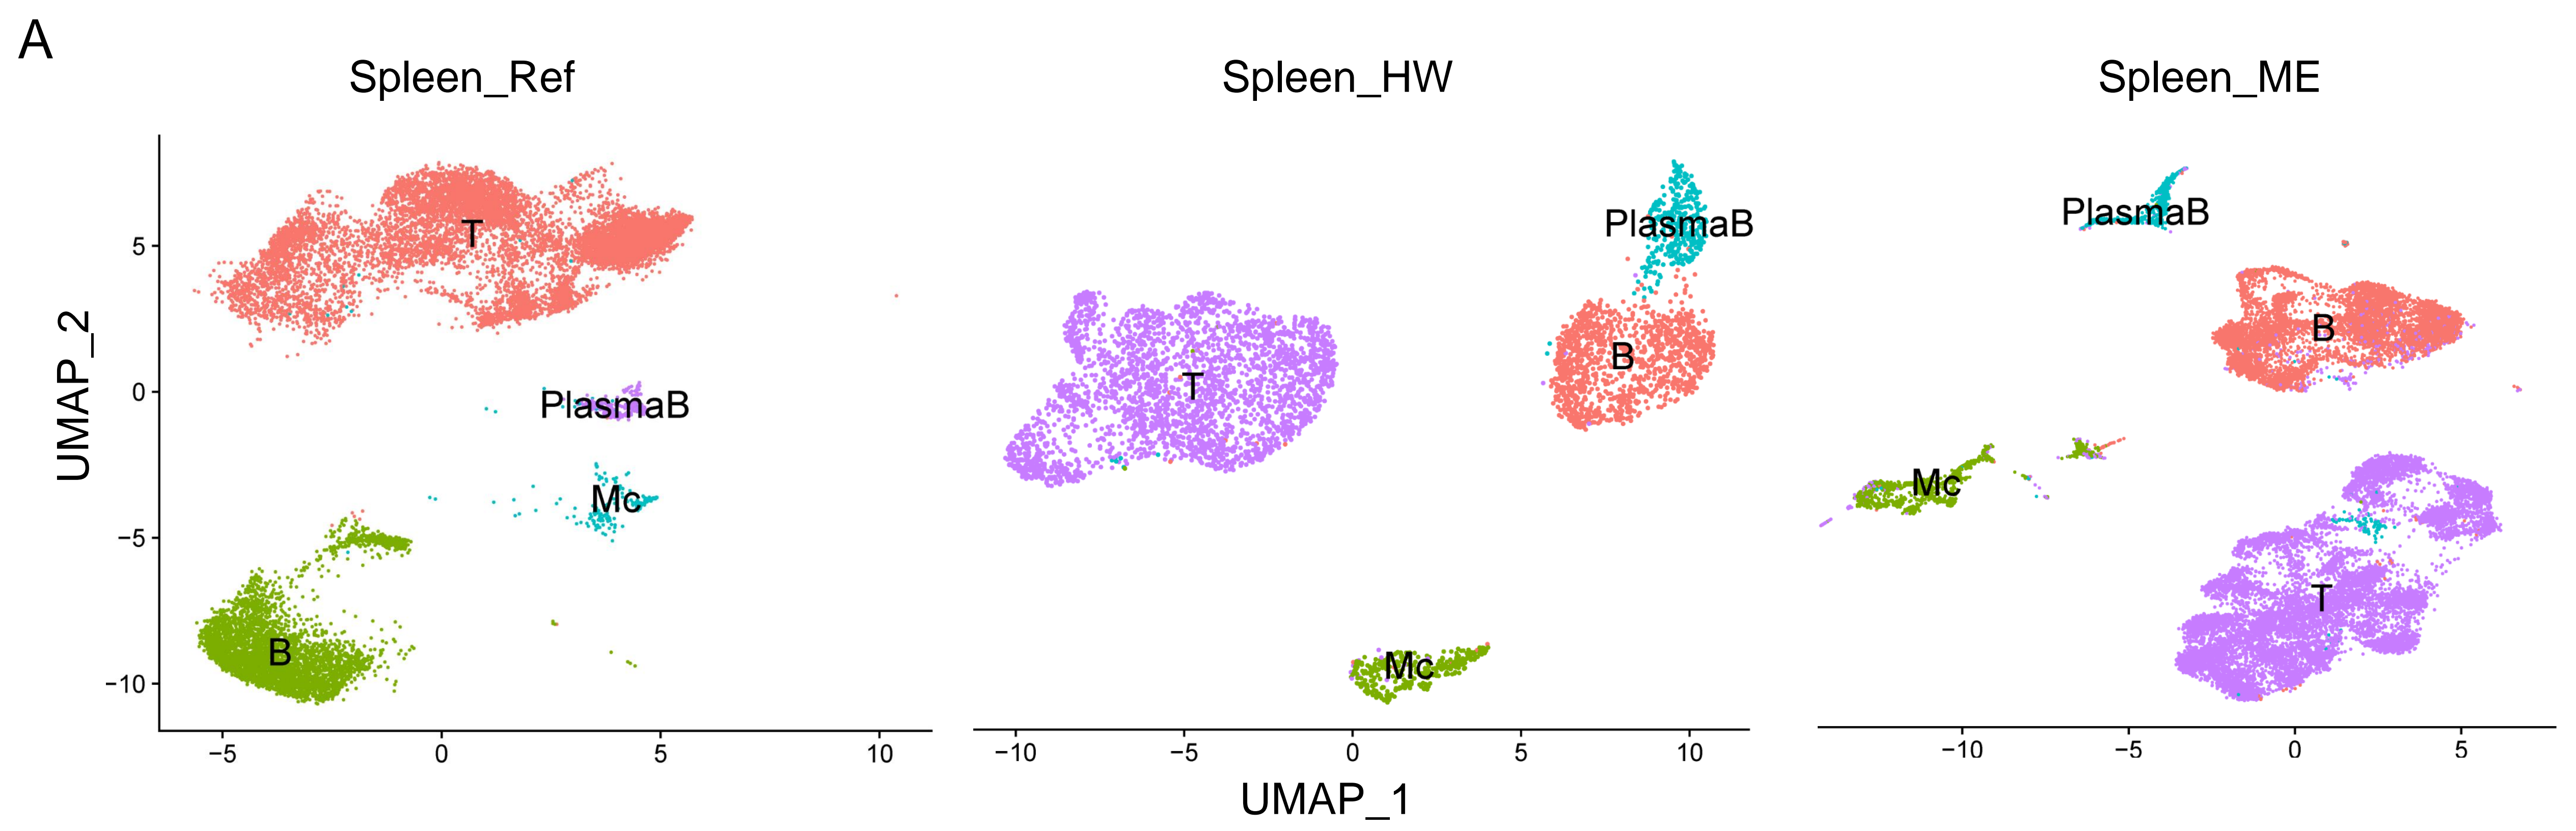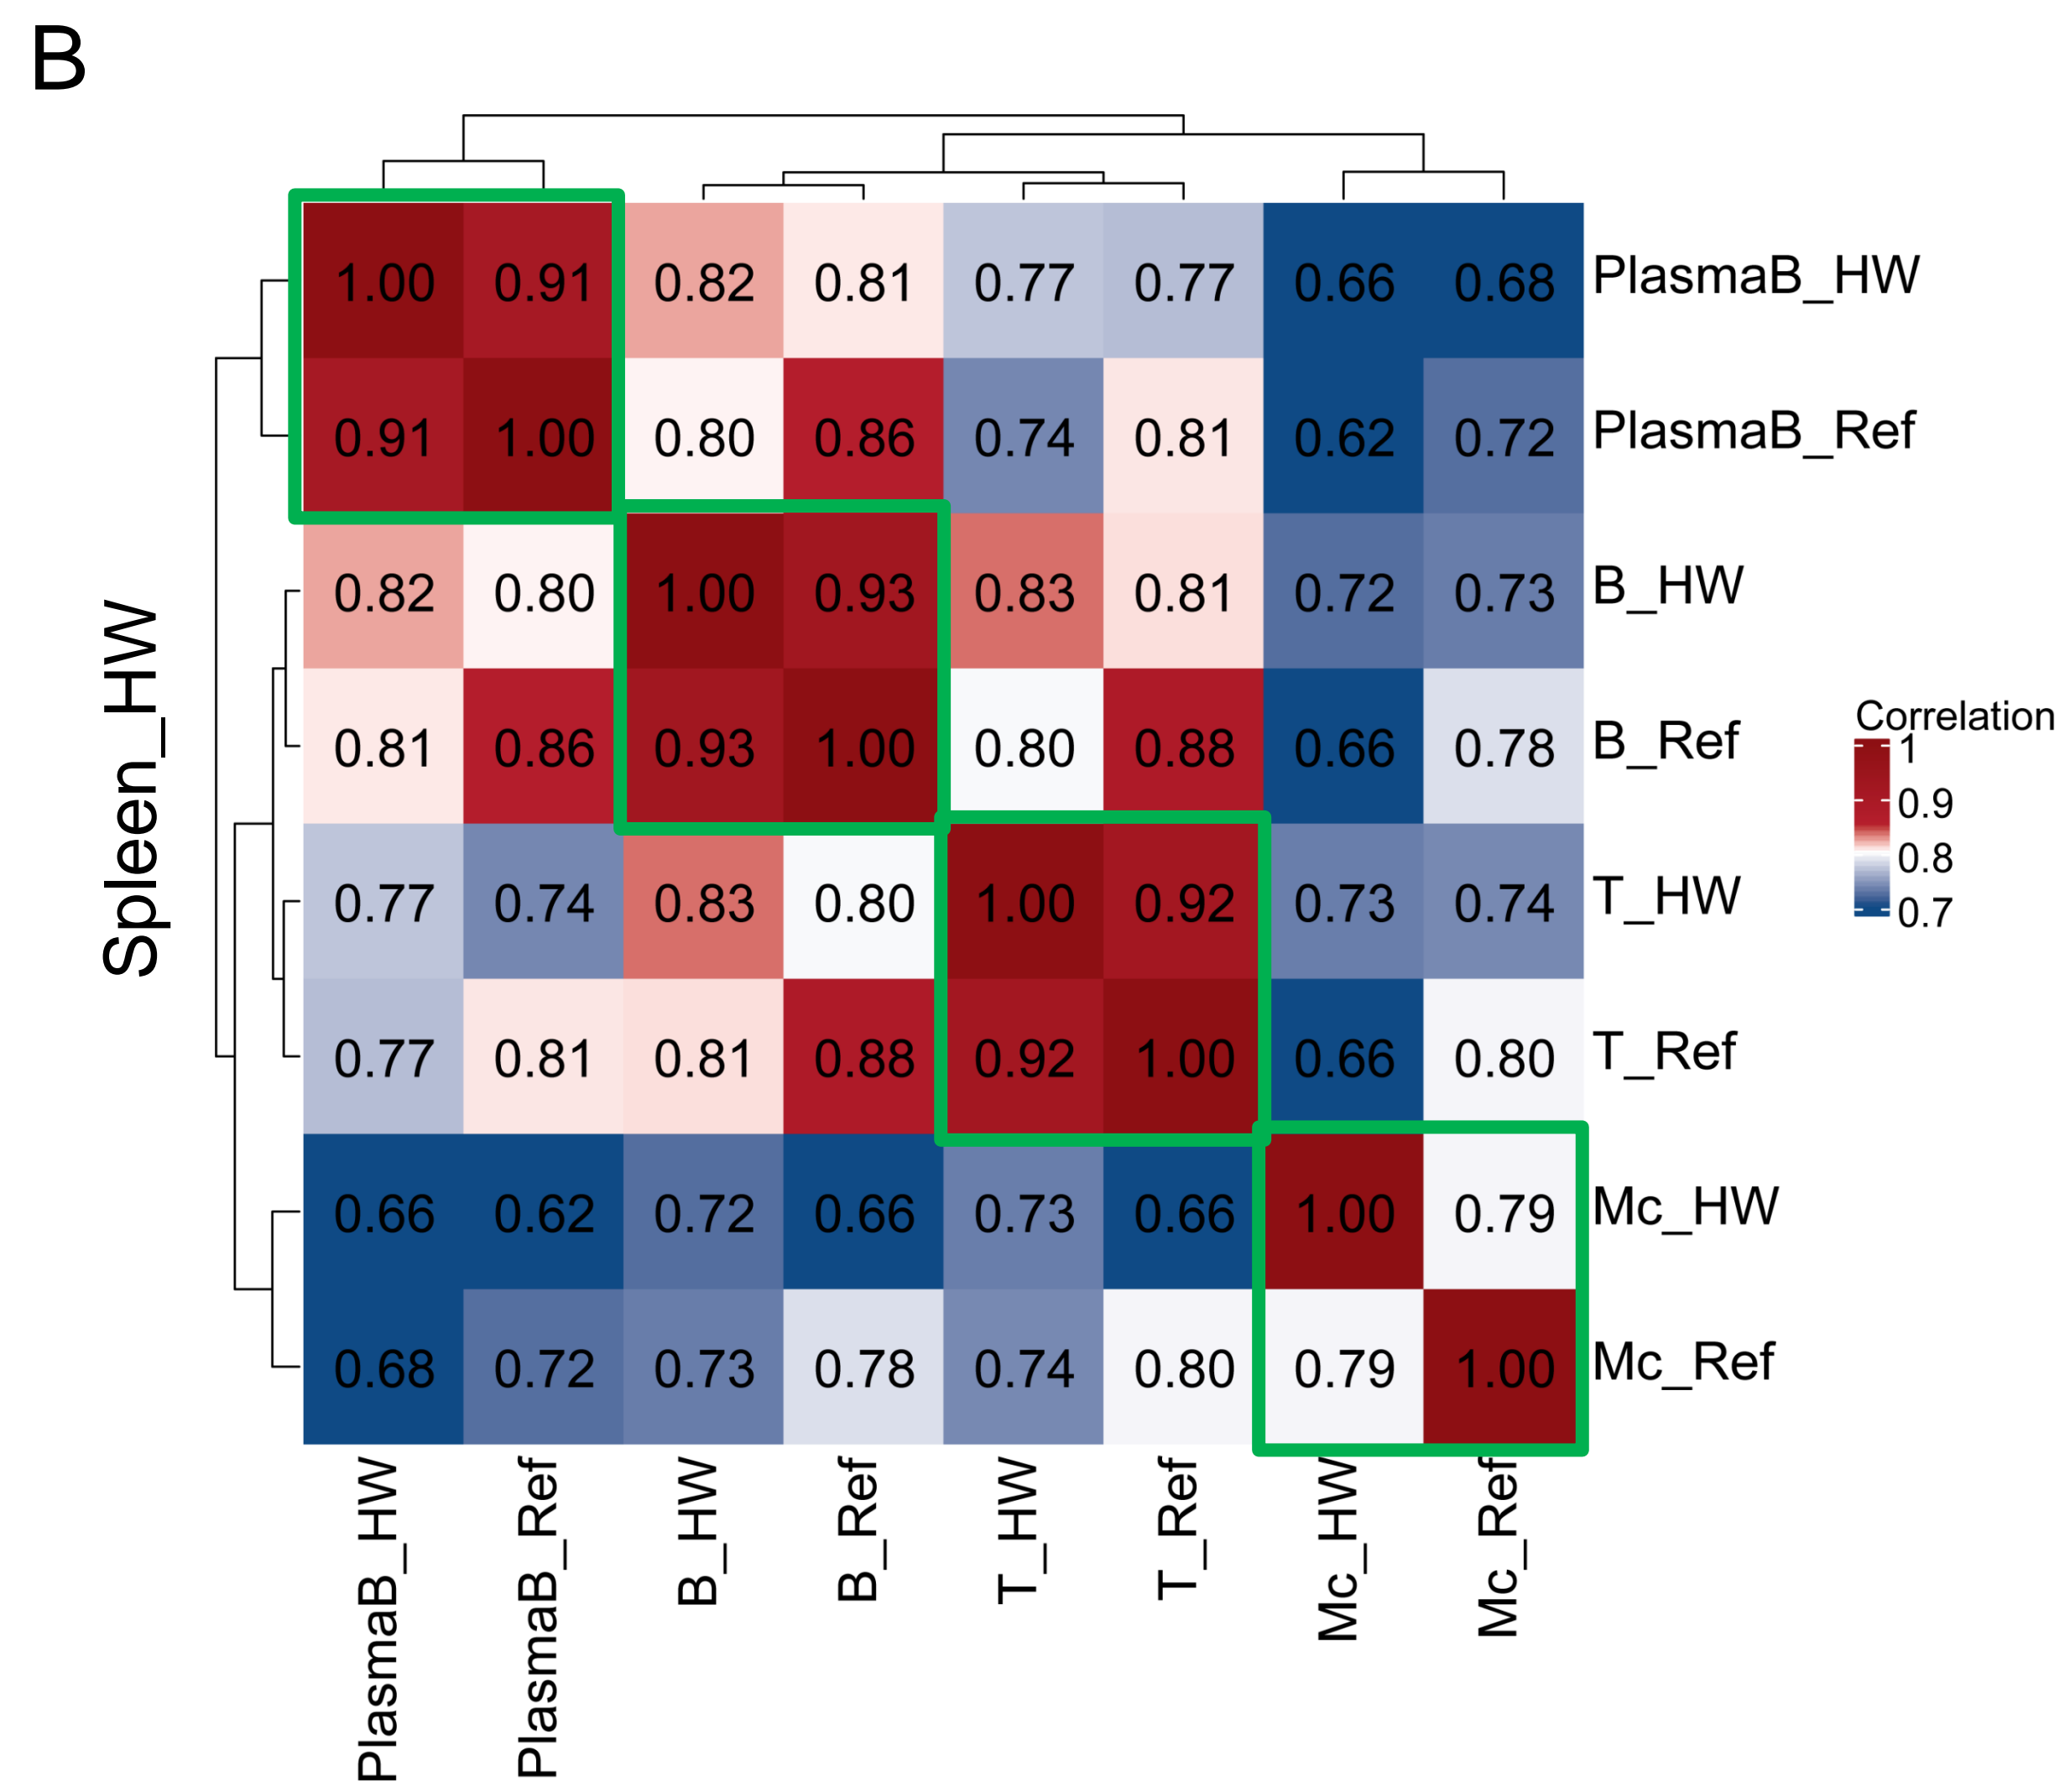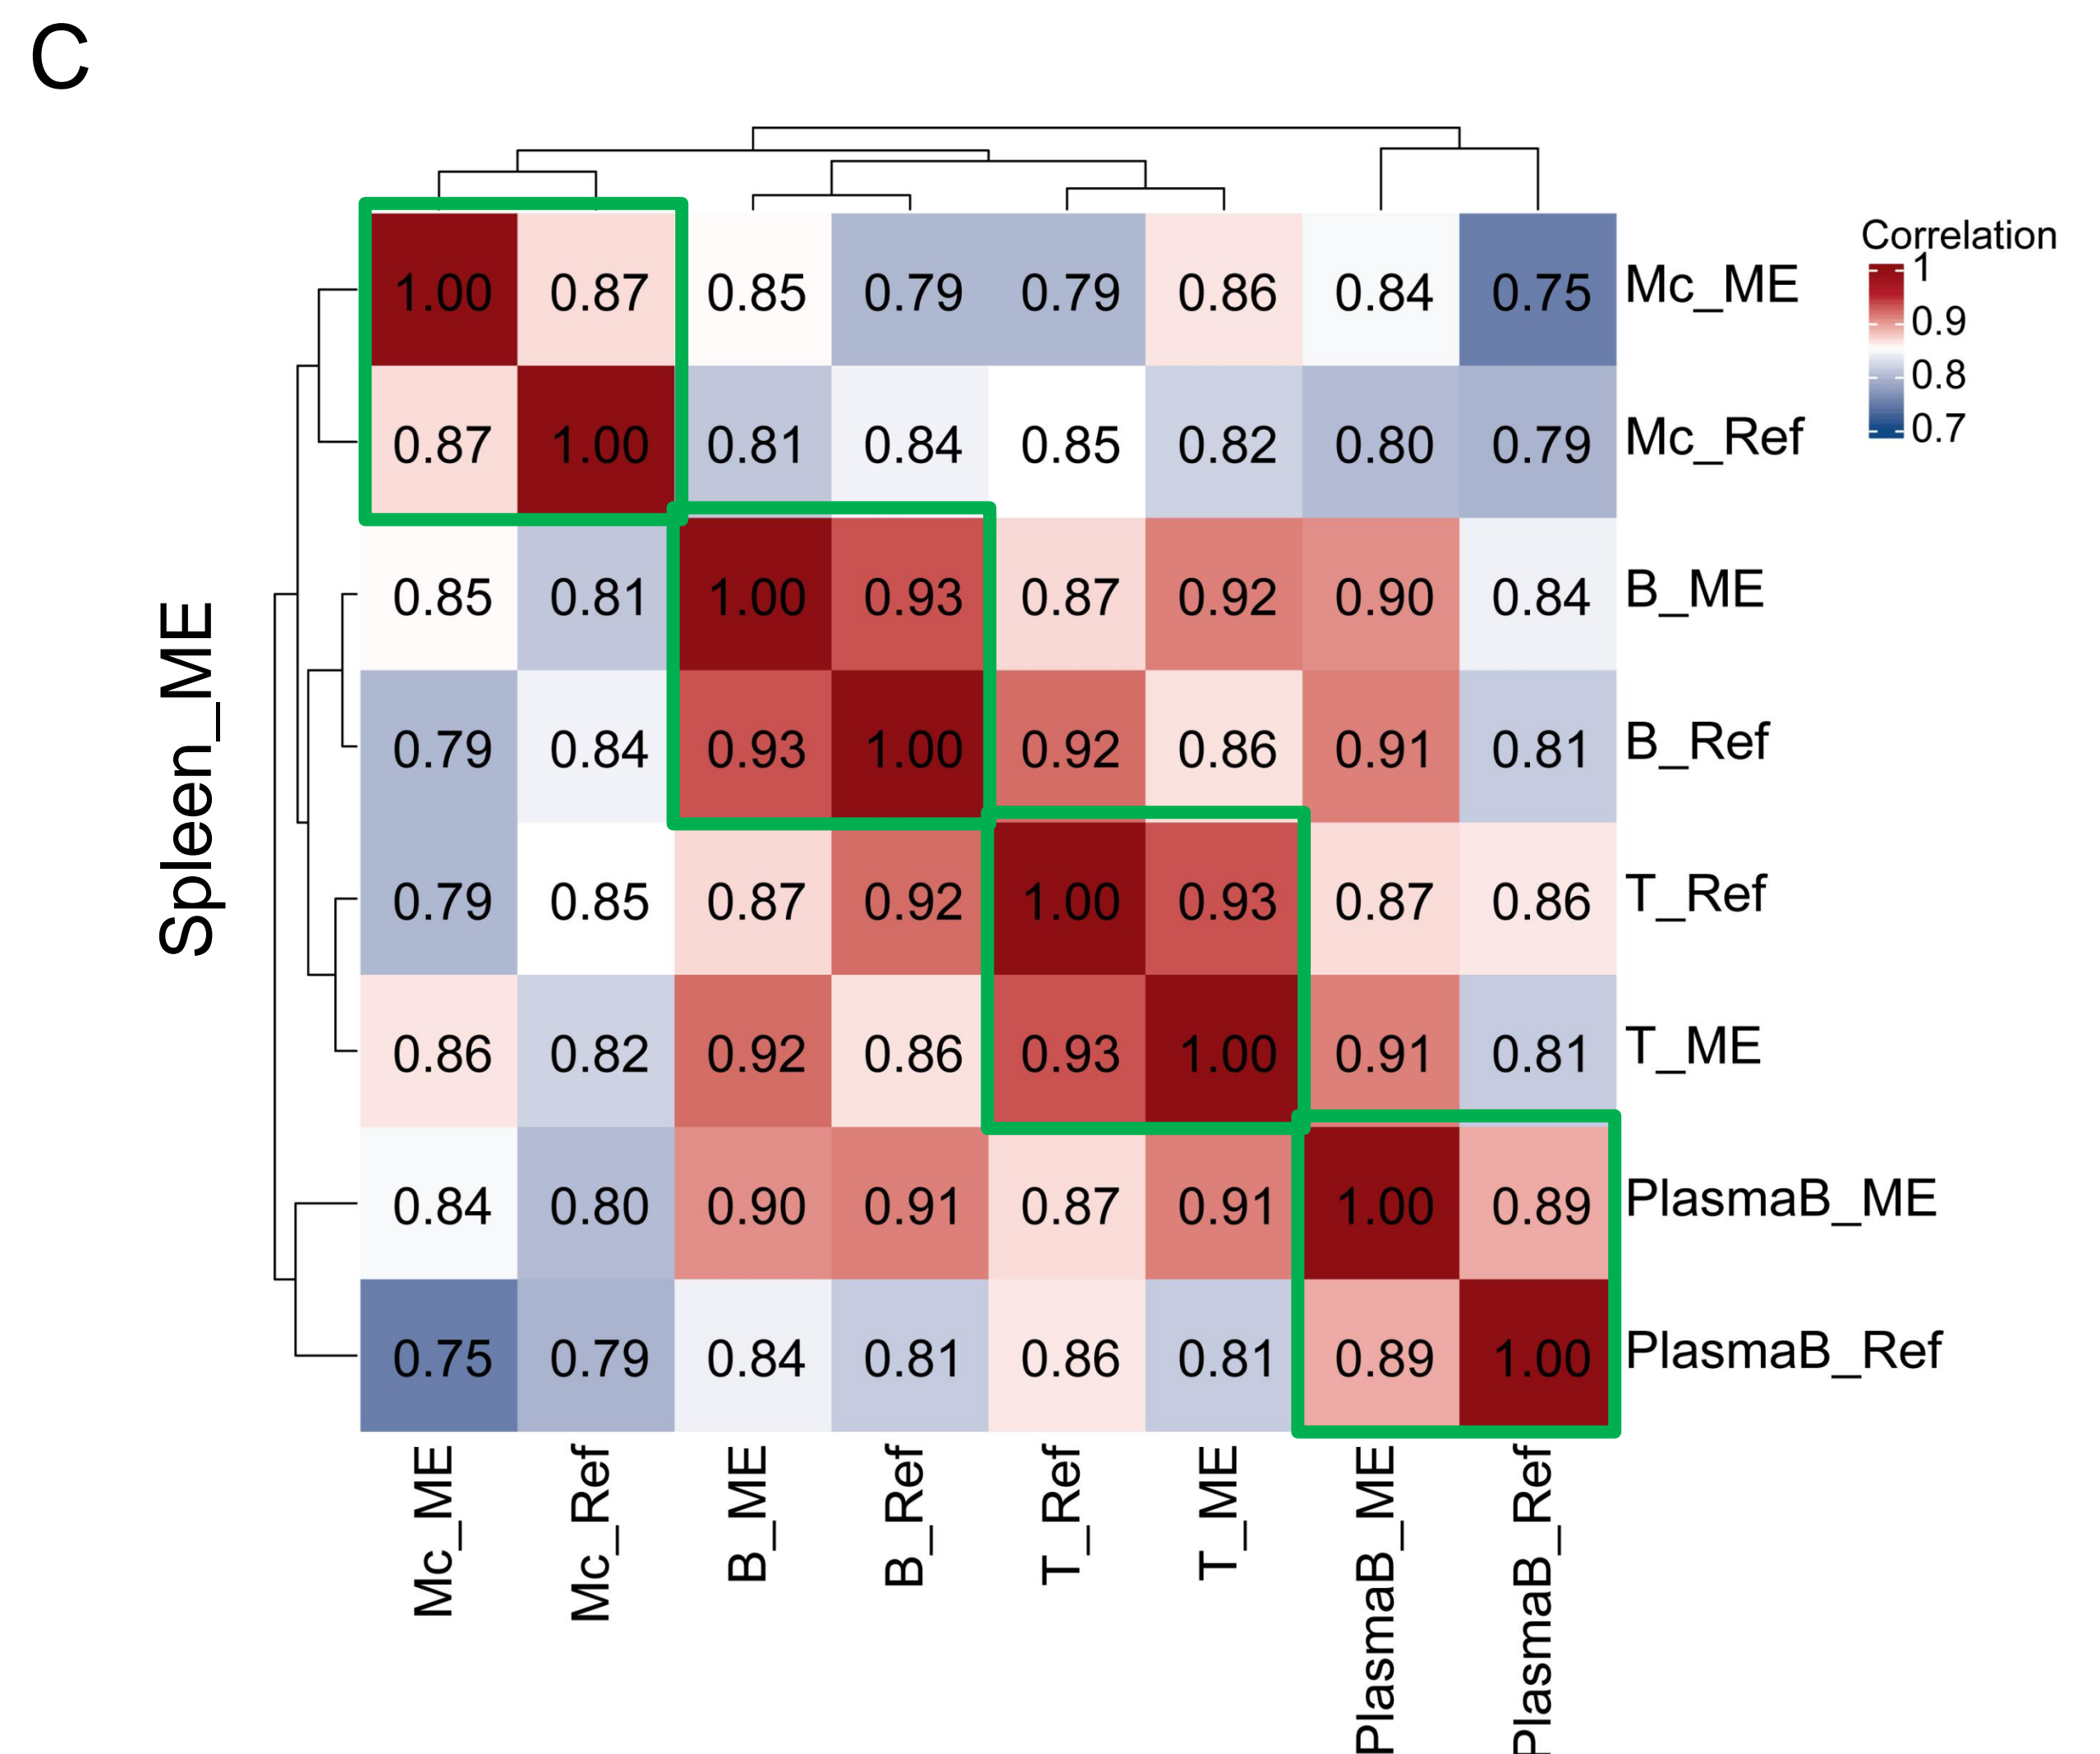

A

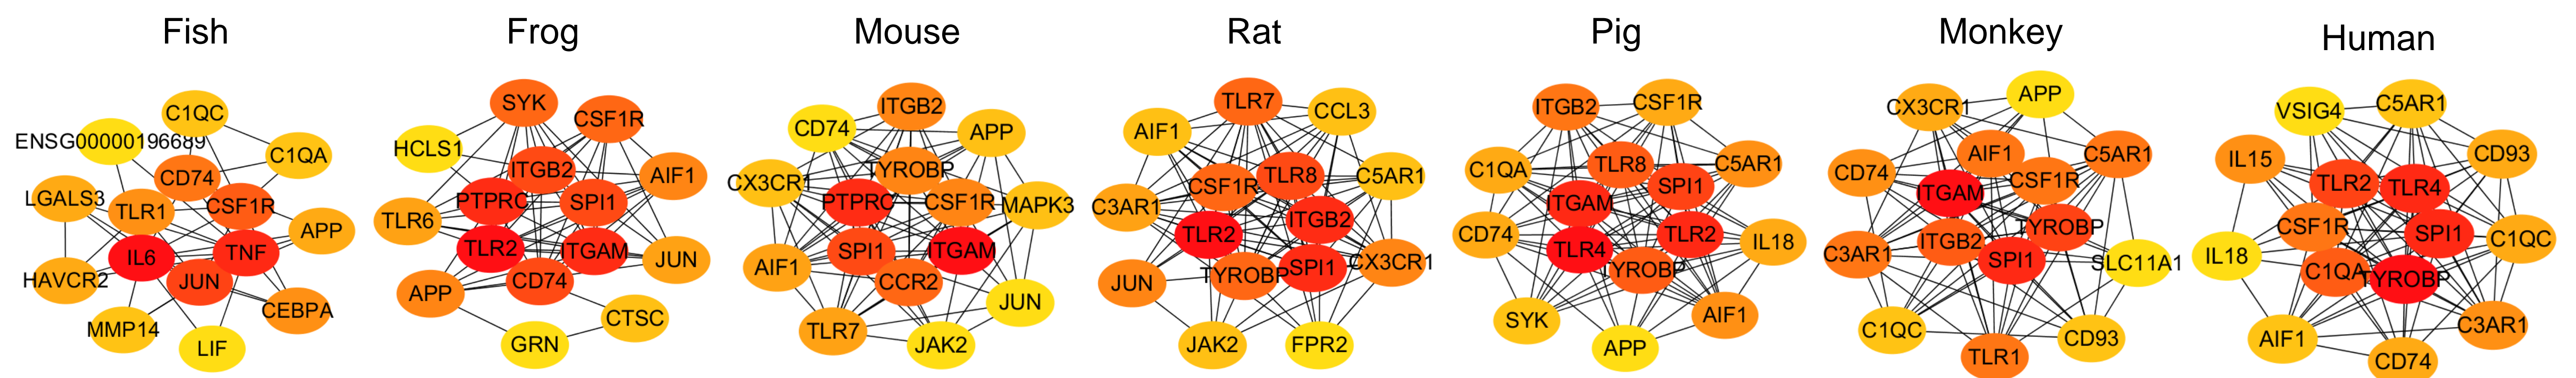

B

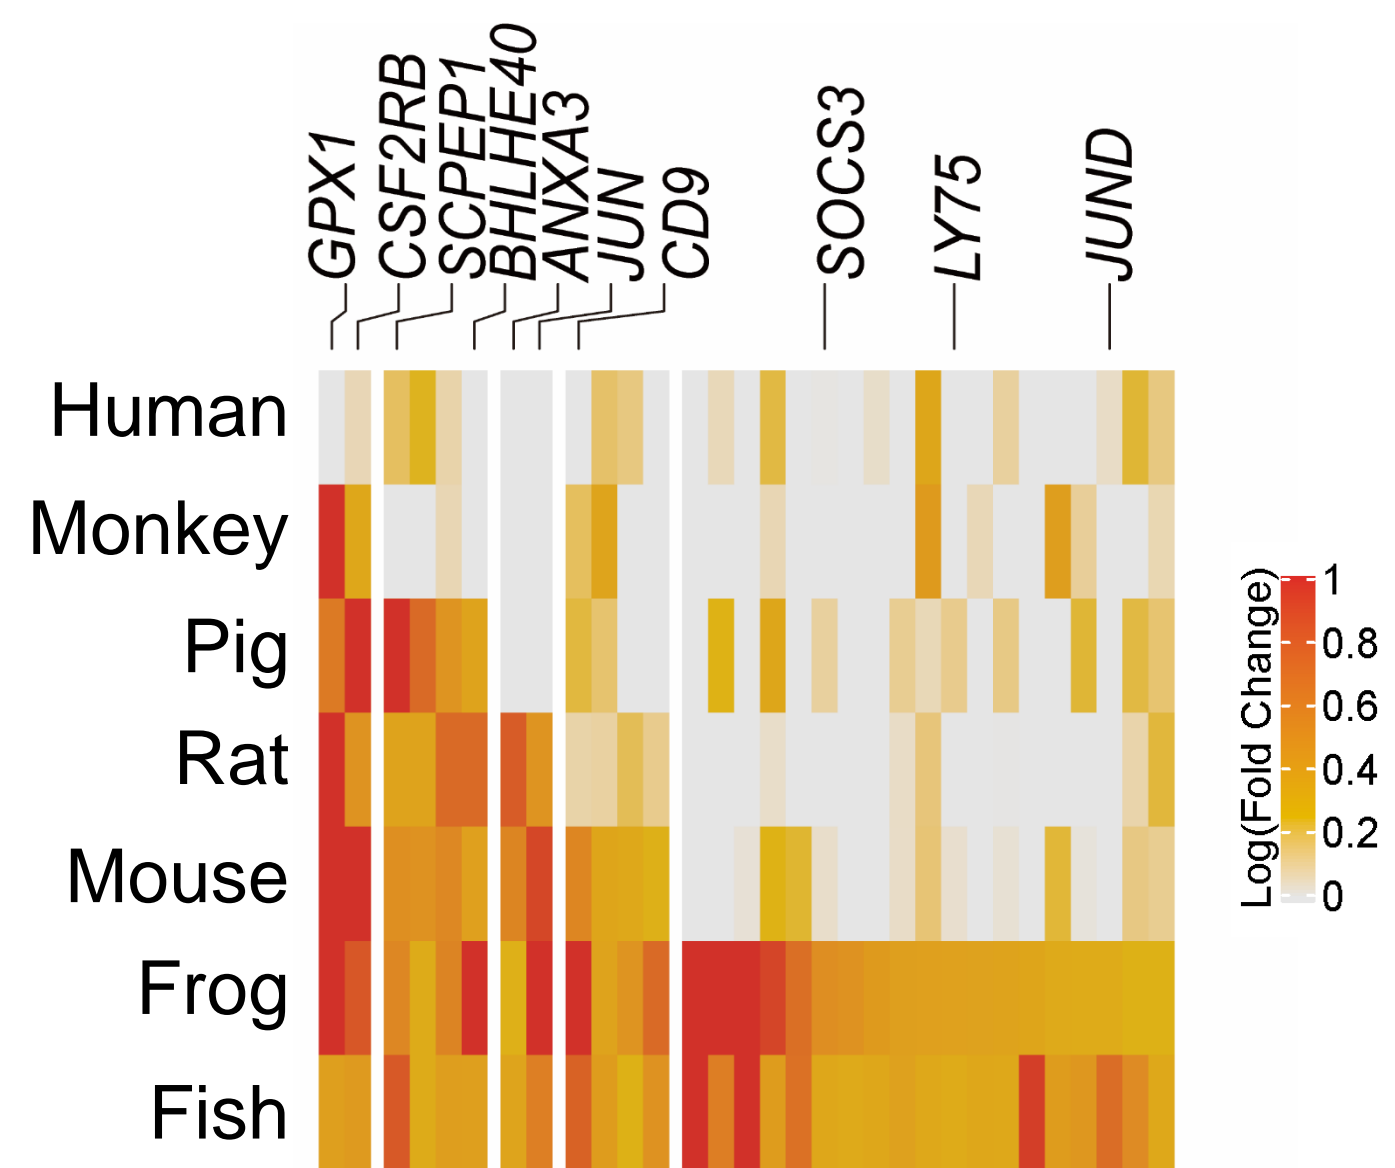

C

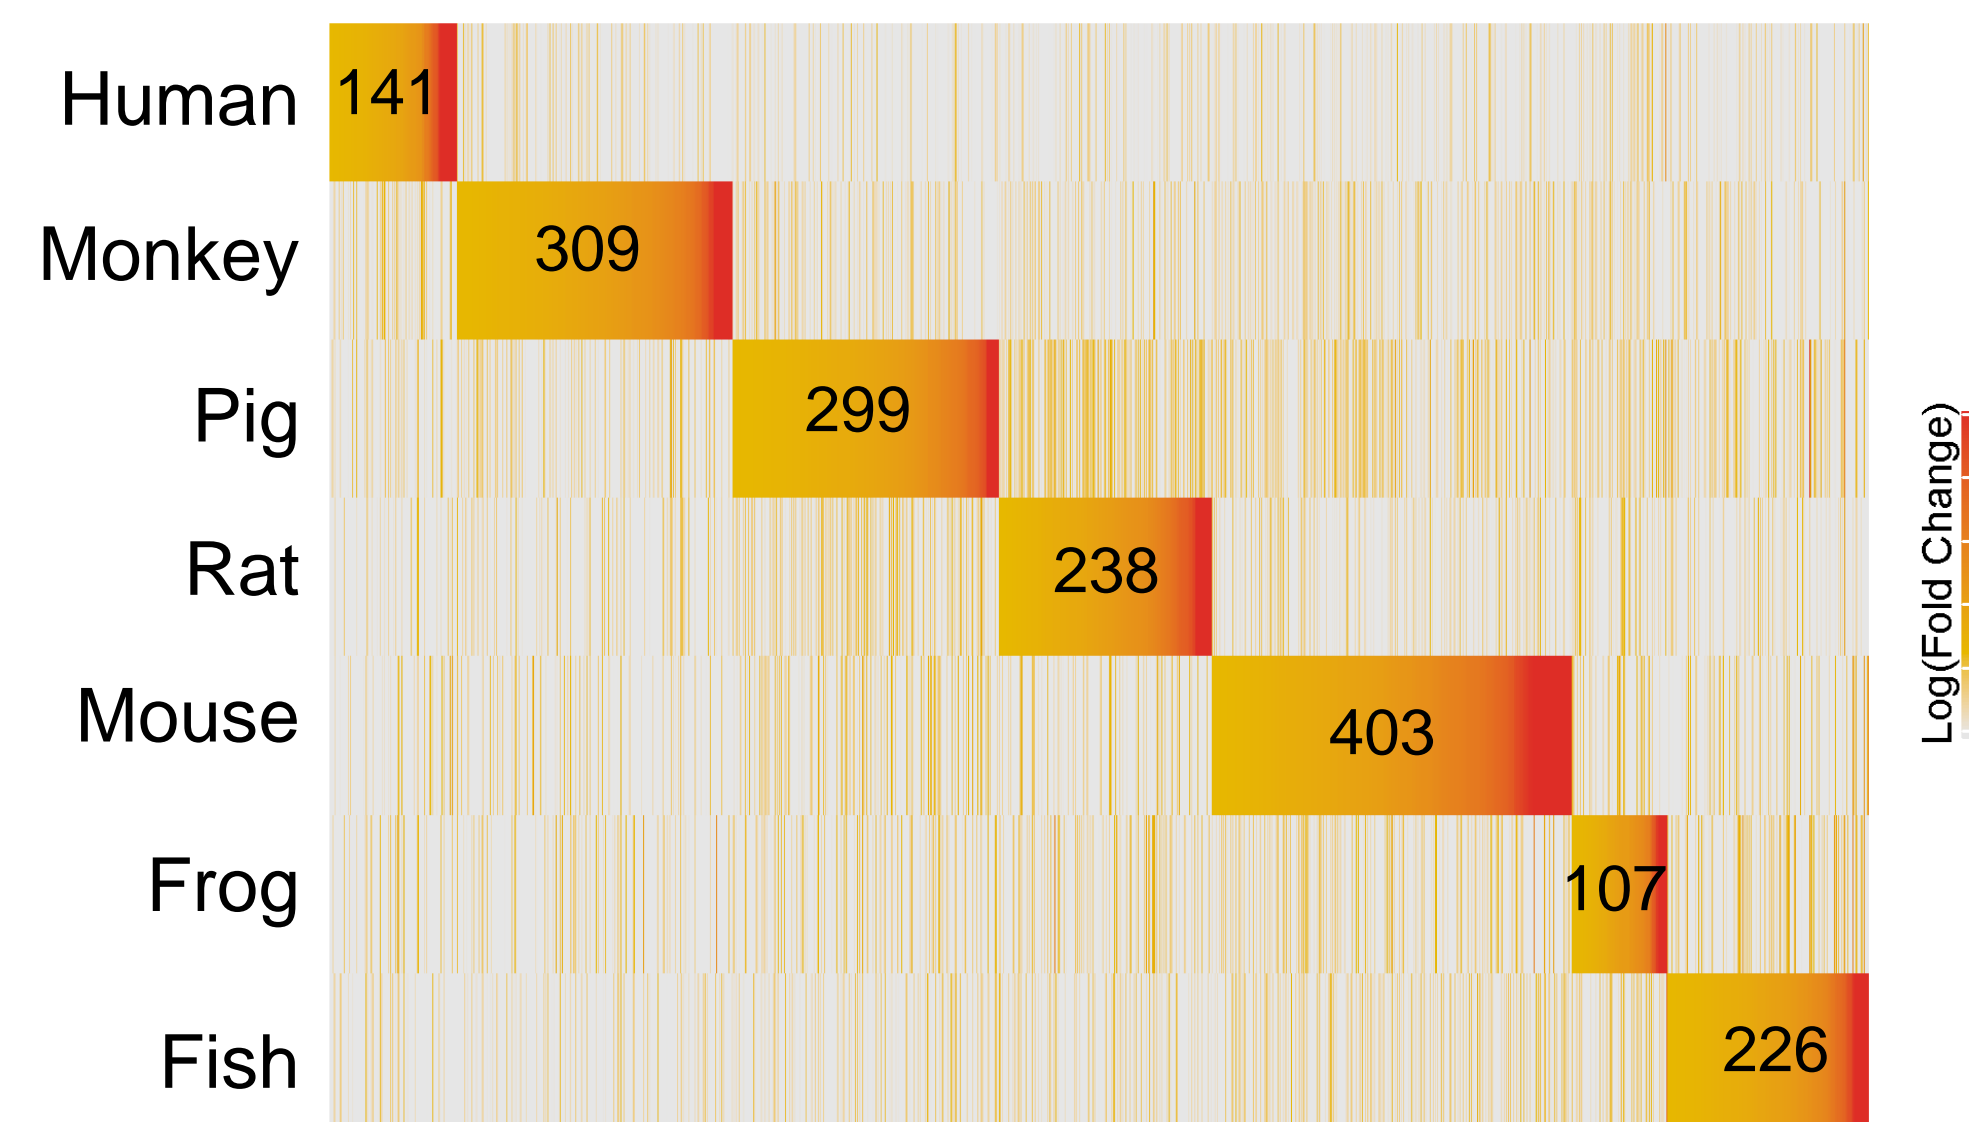

D

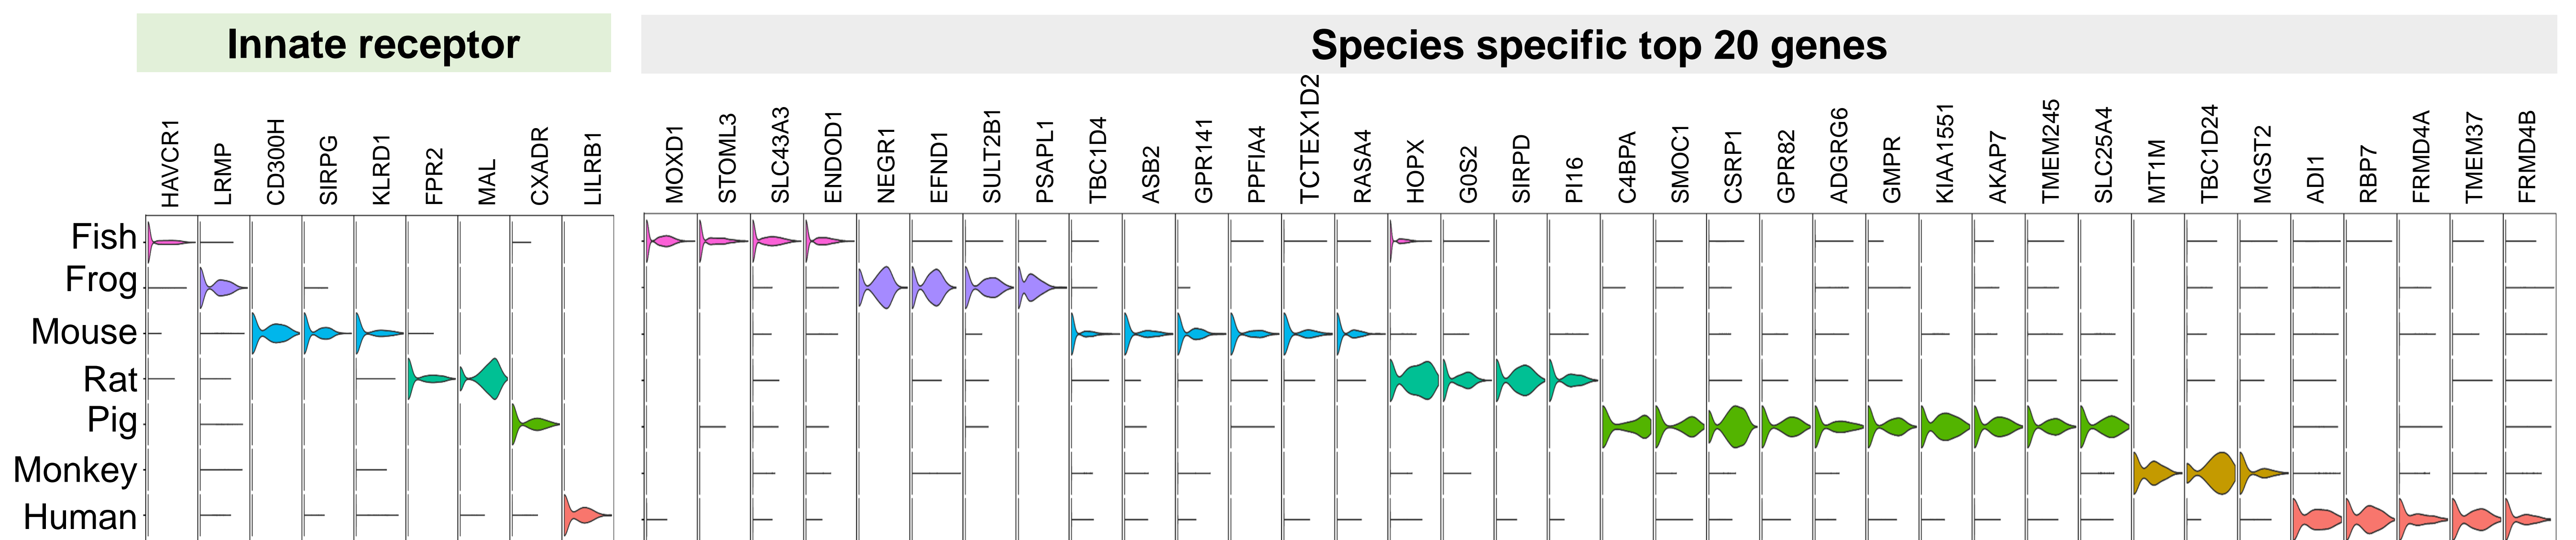

E

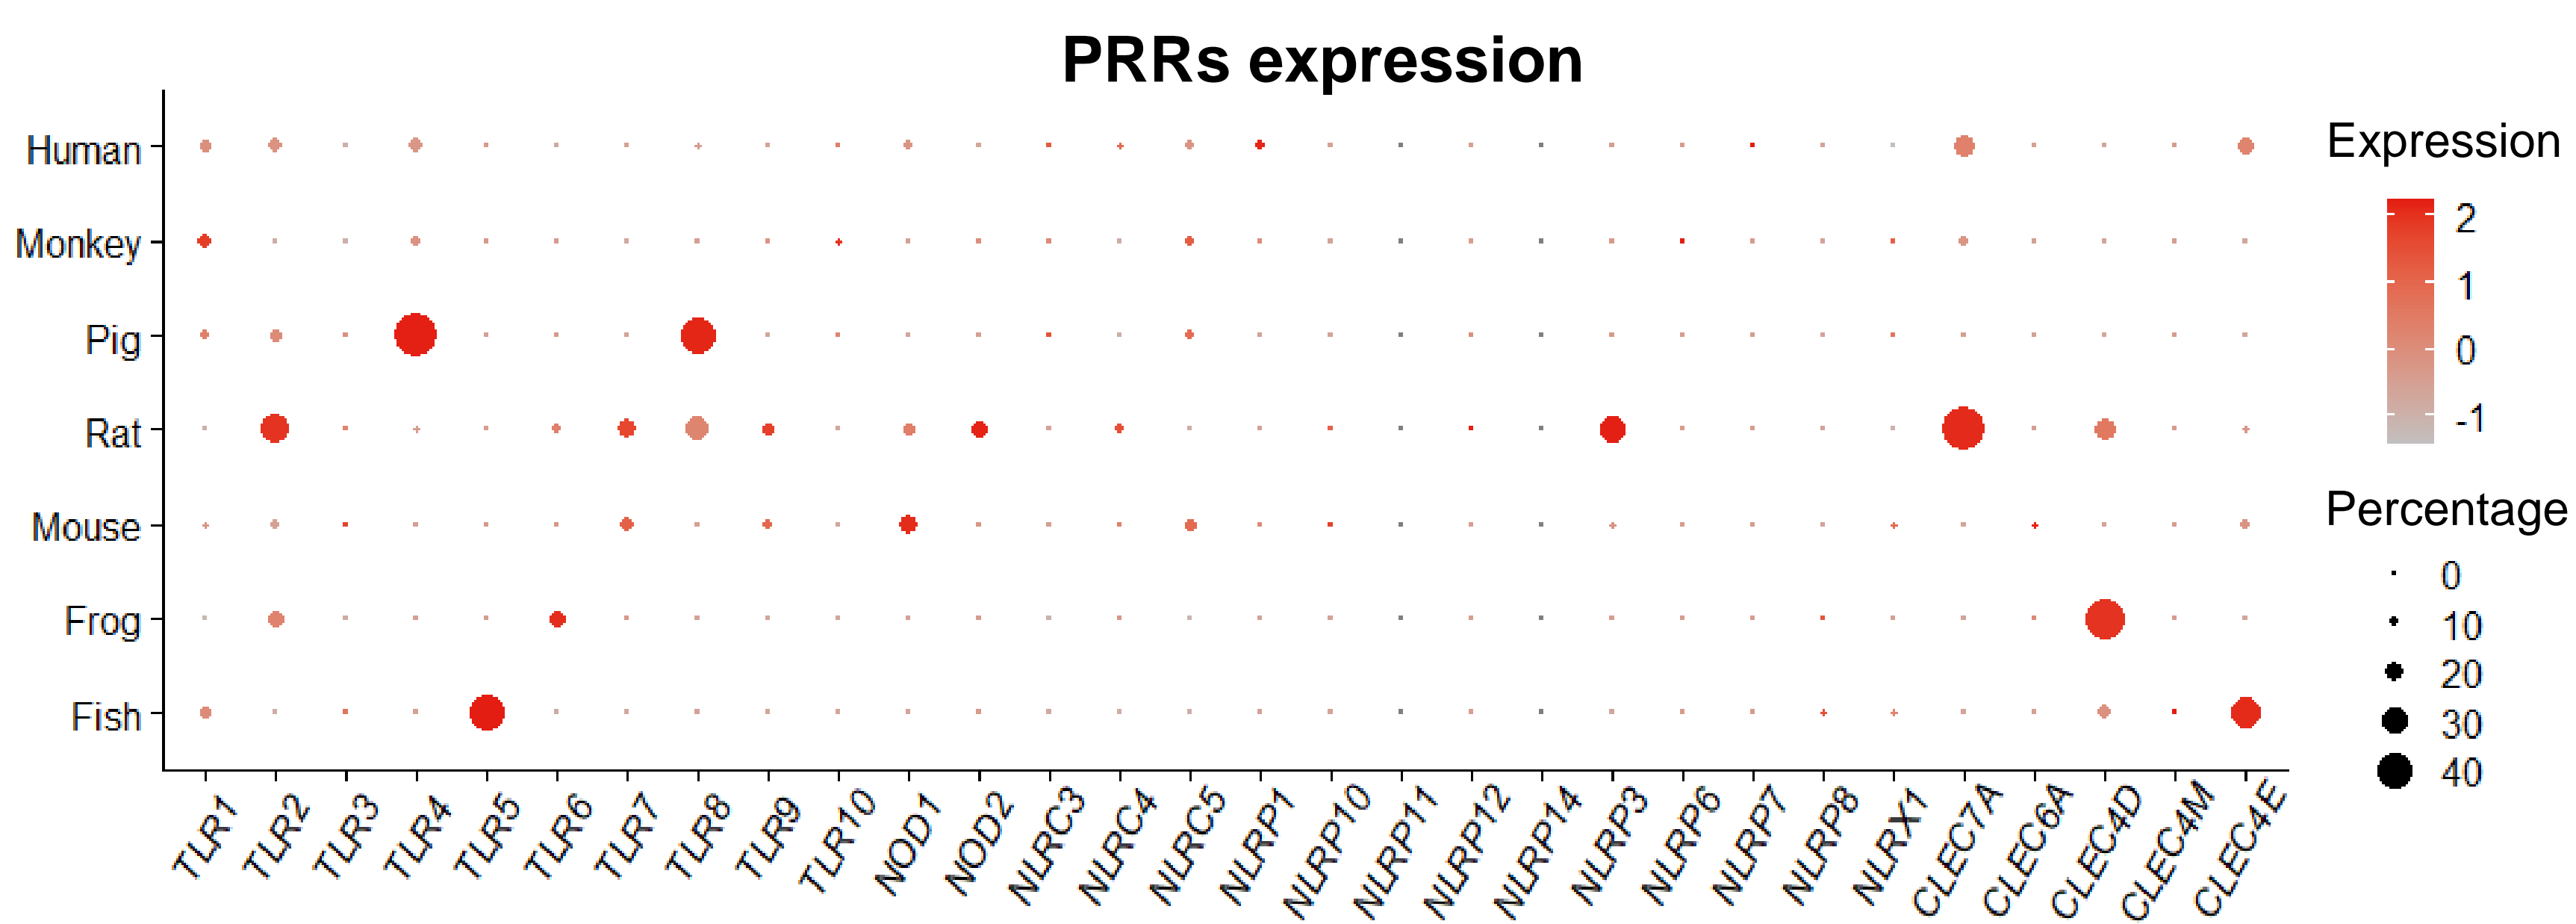

A

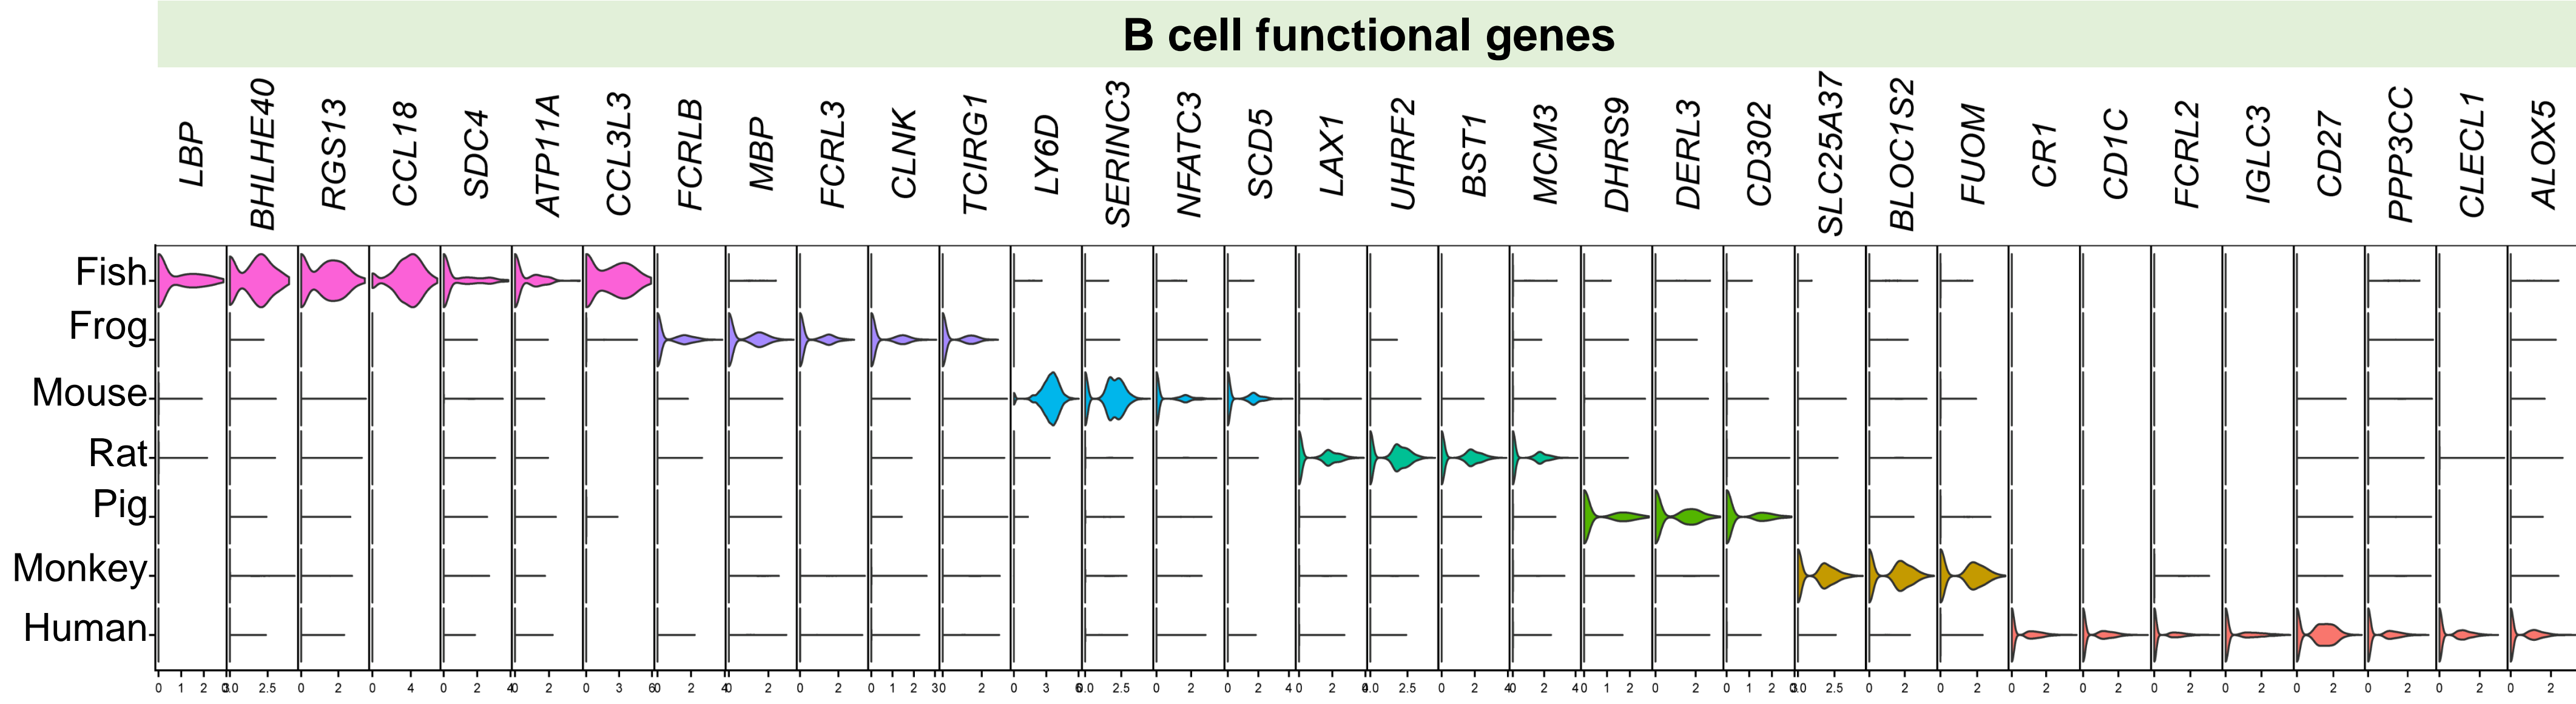

B

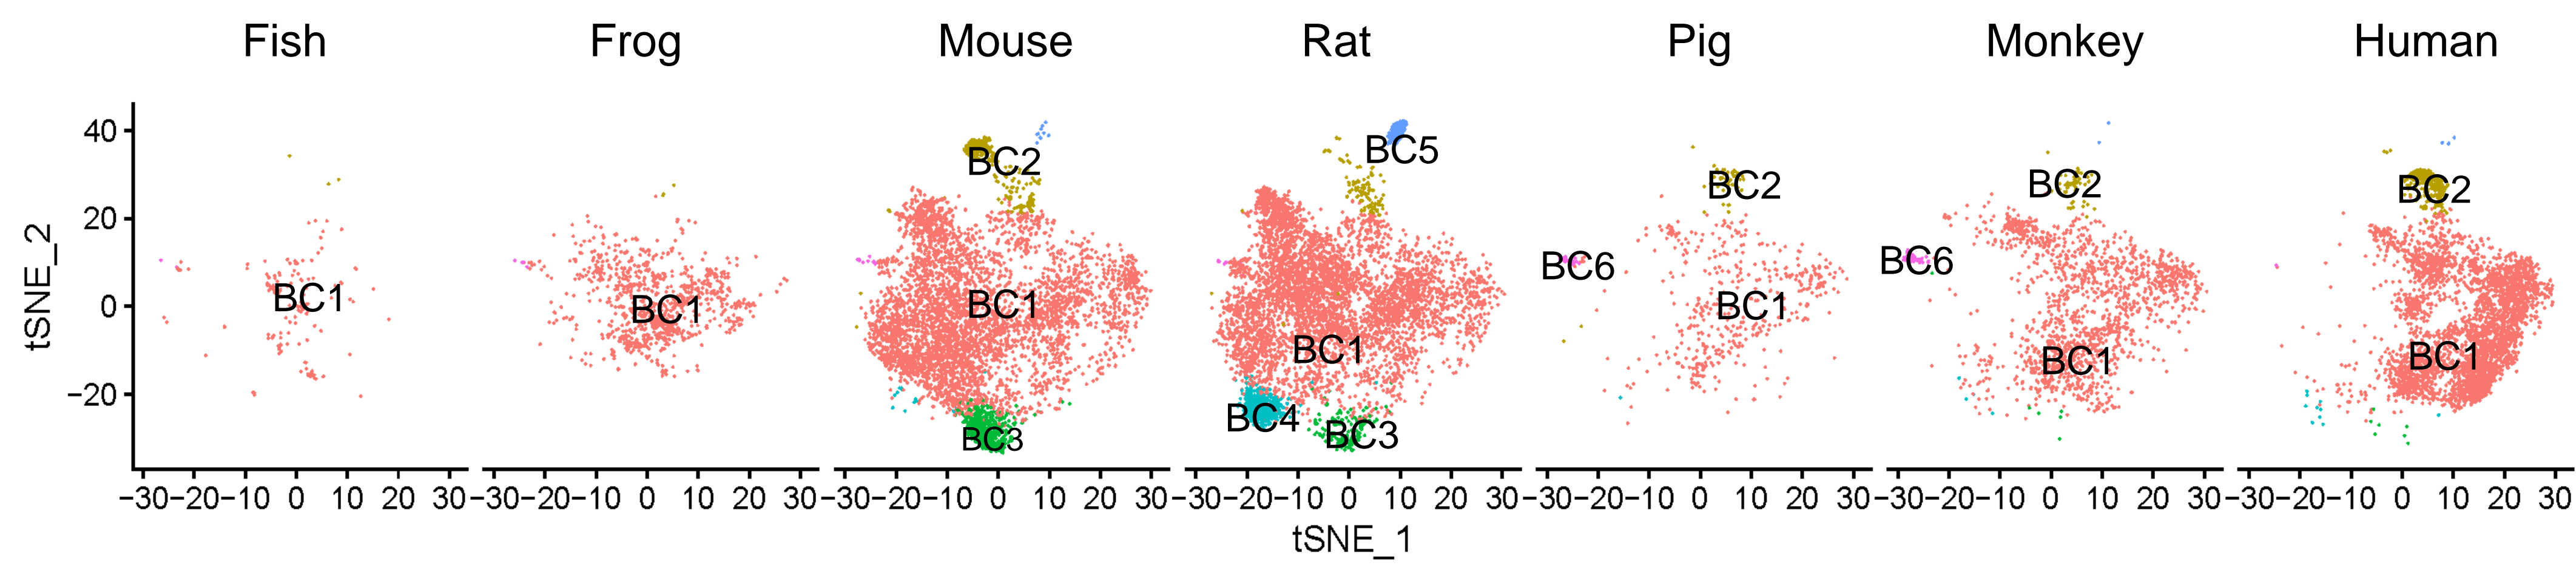

C

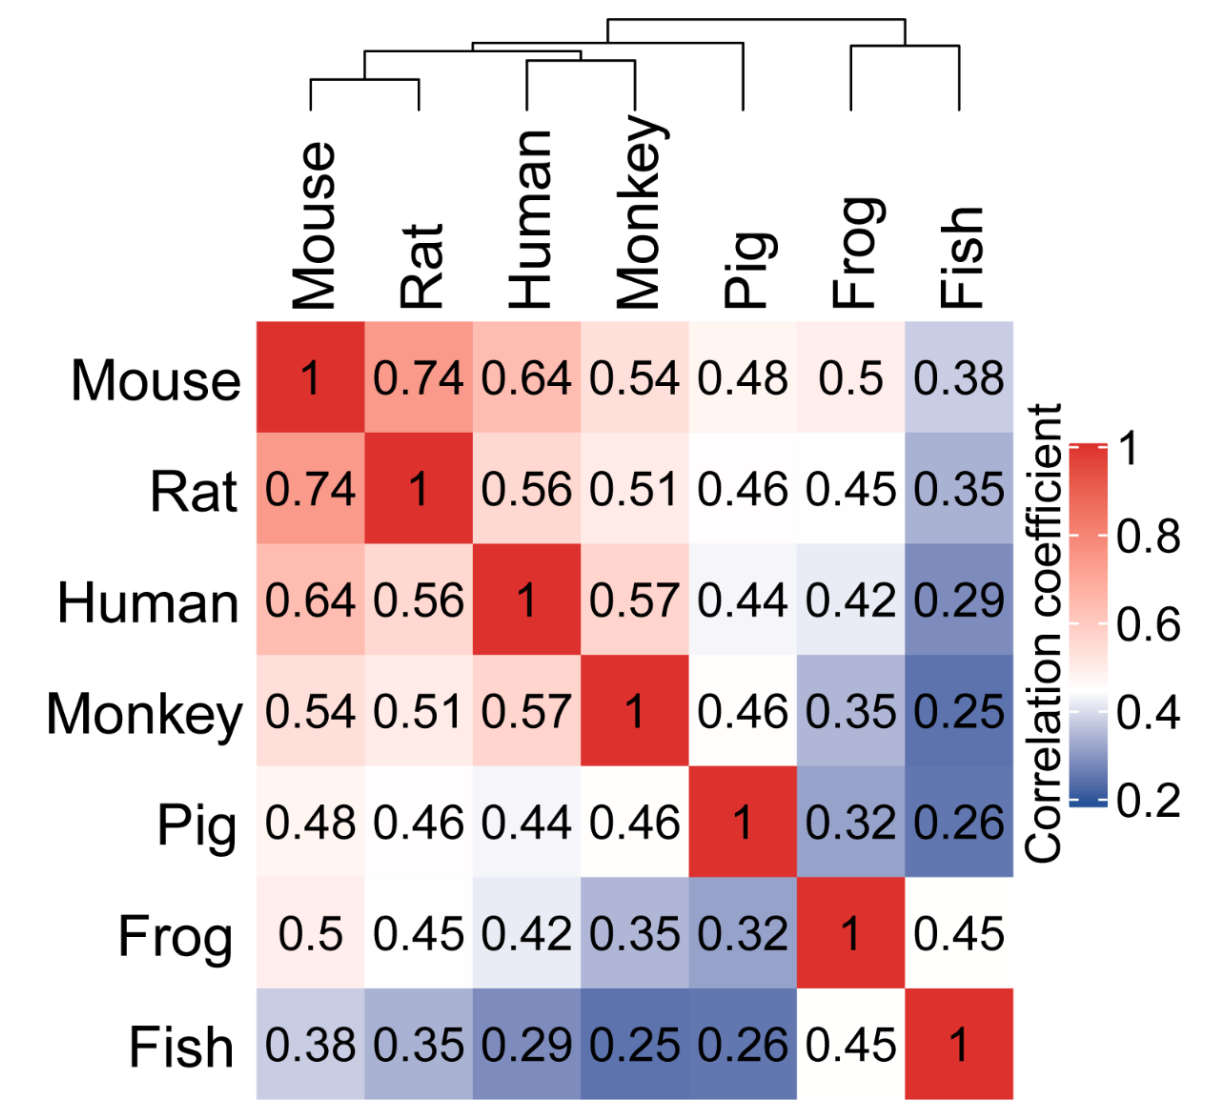

D

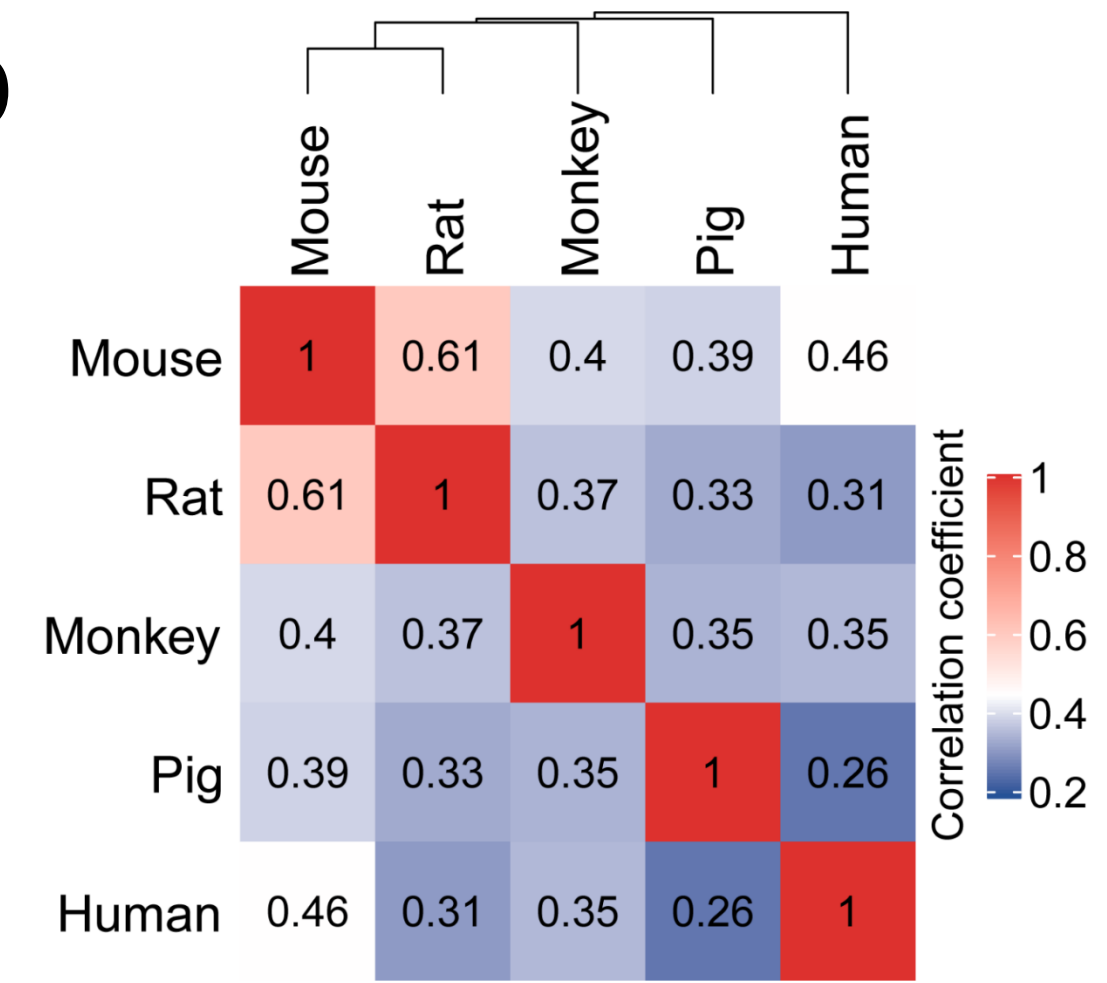

A

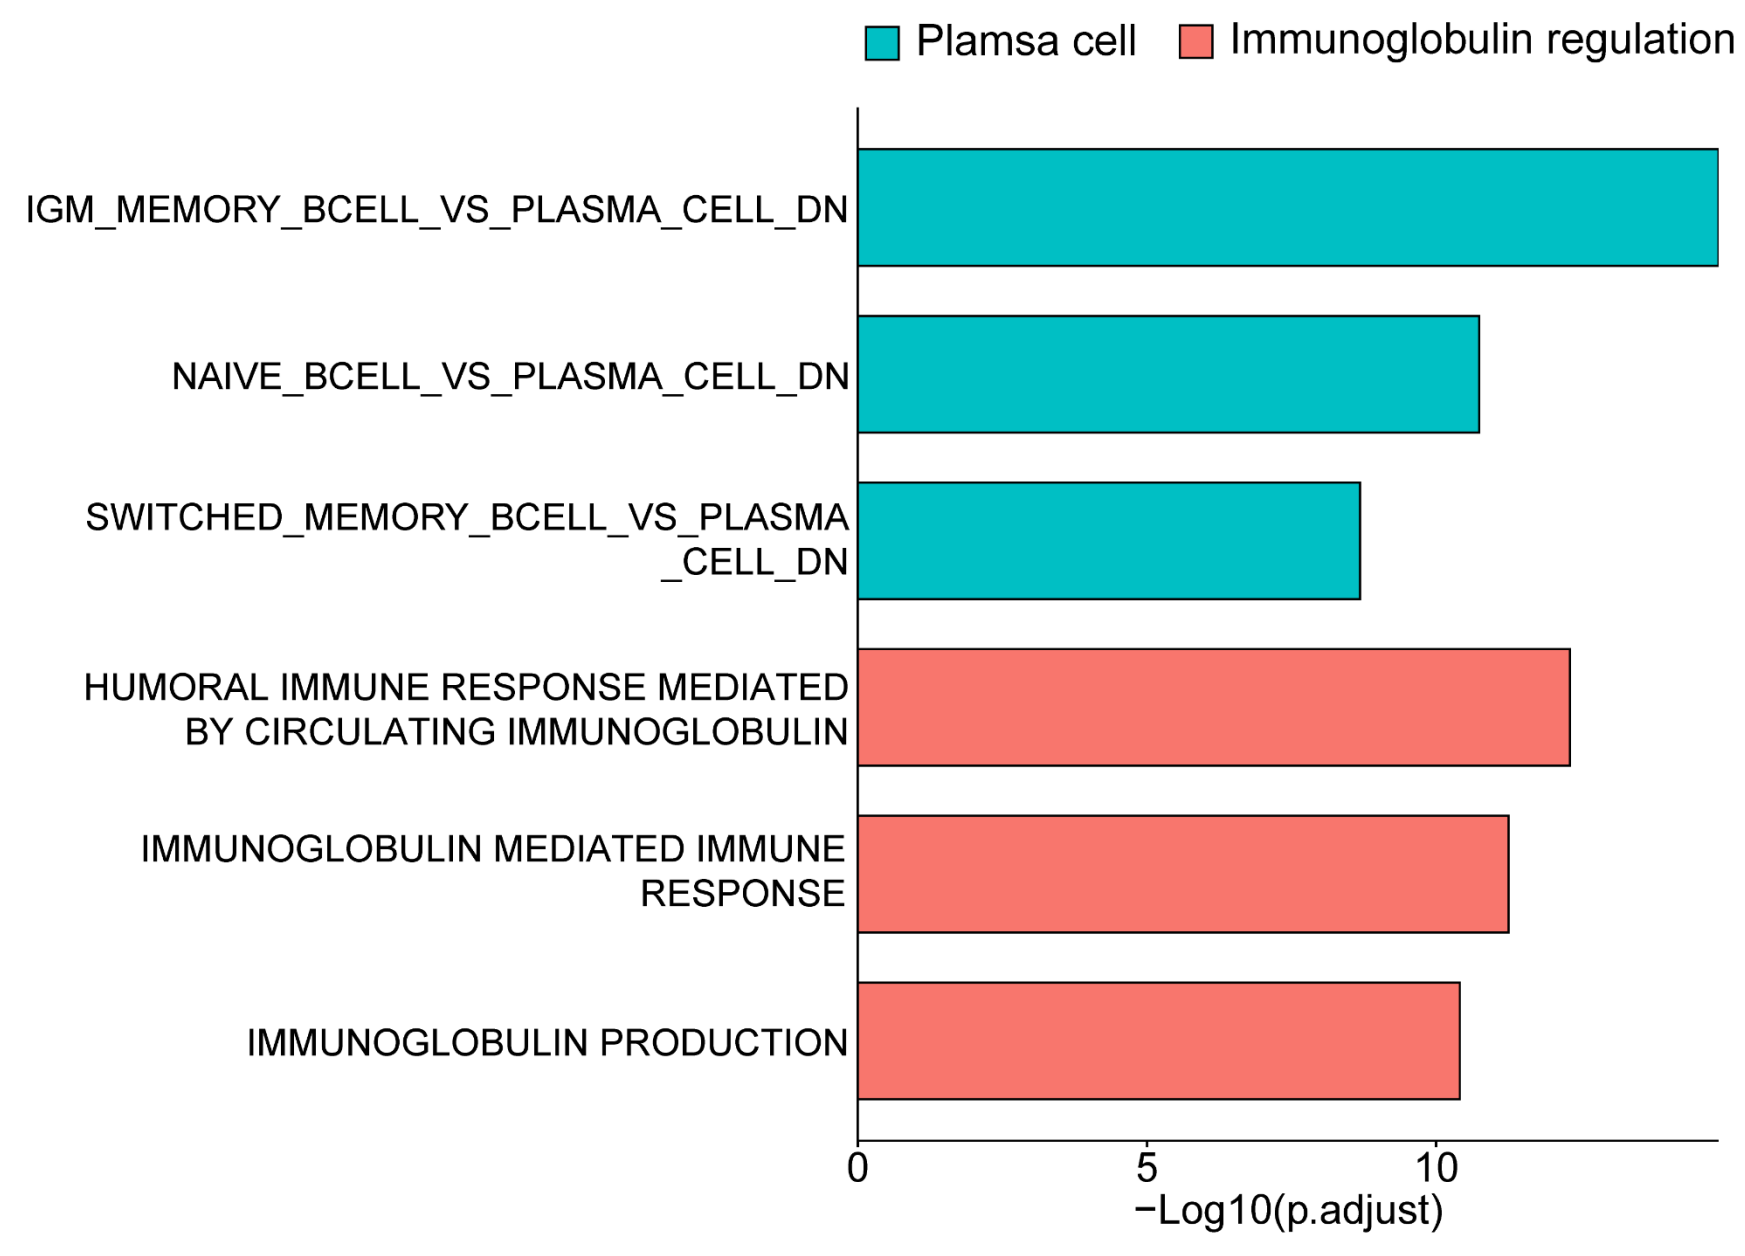

B

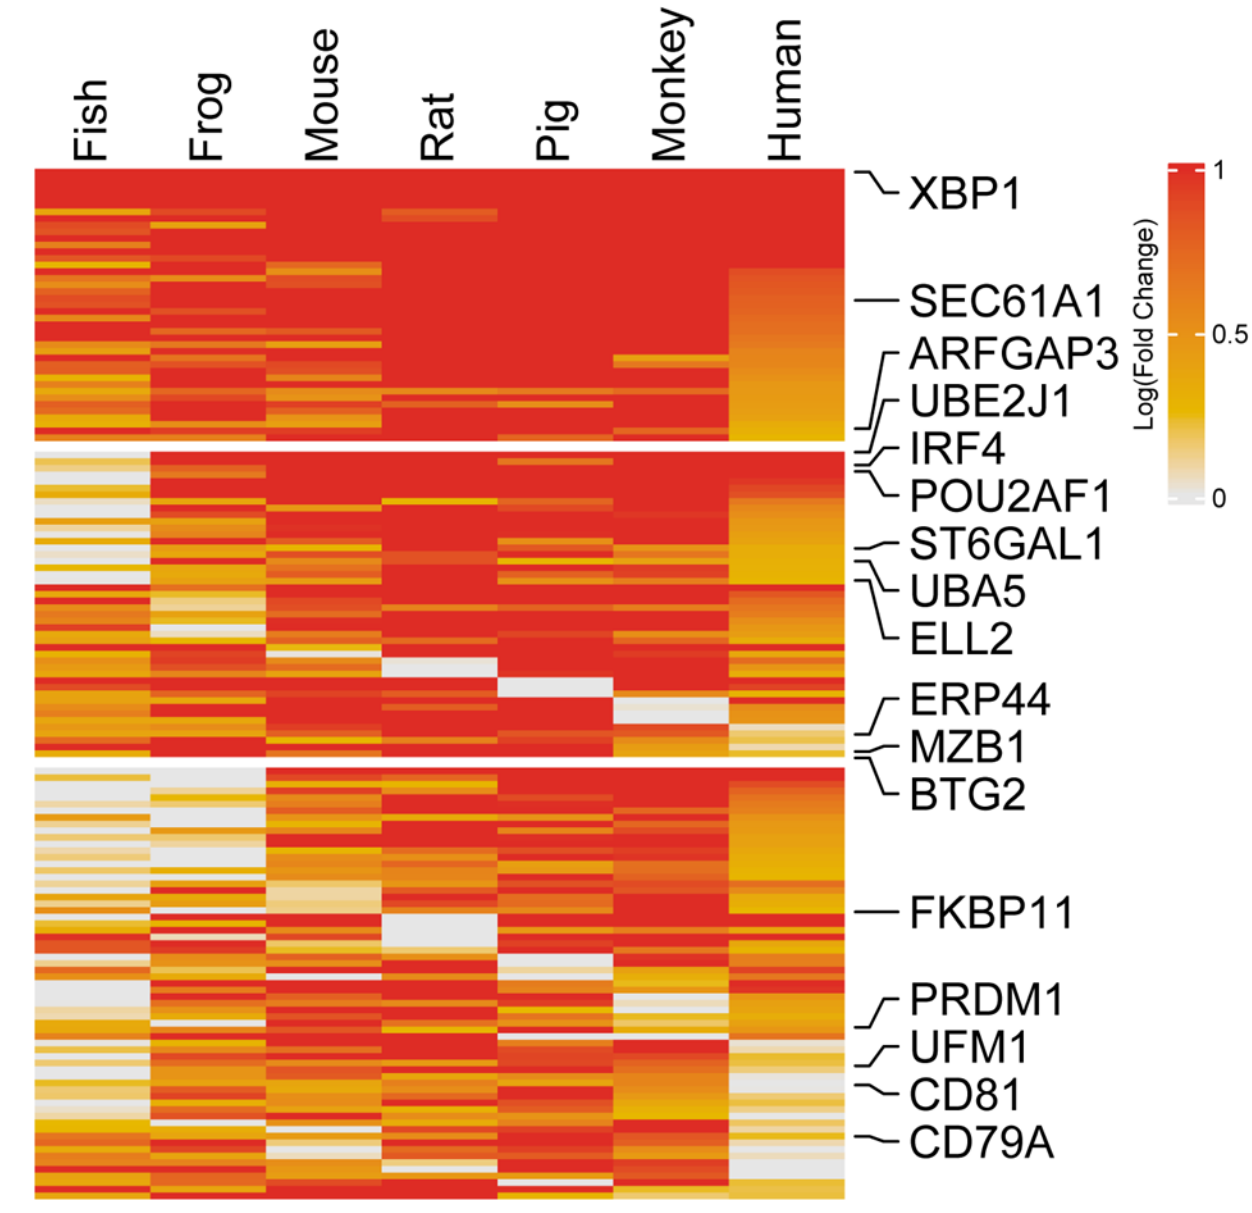

C

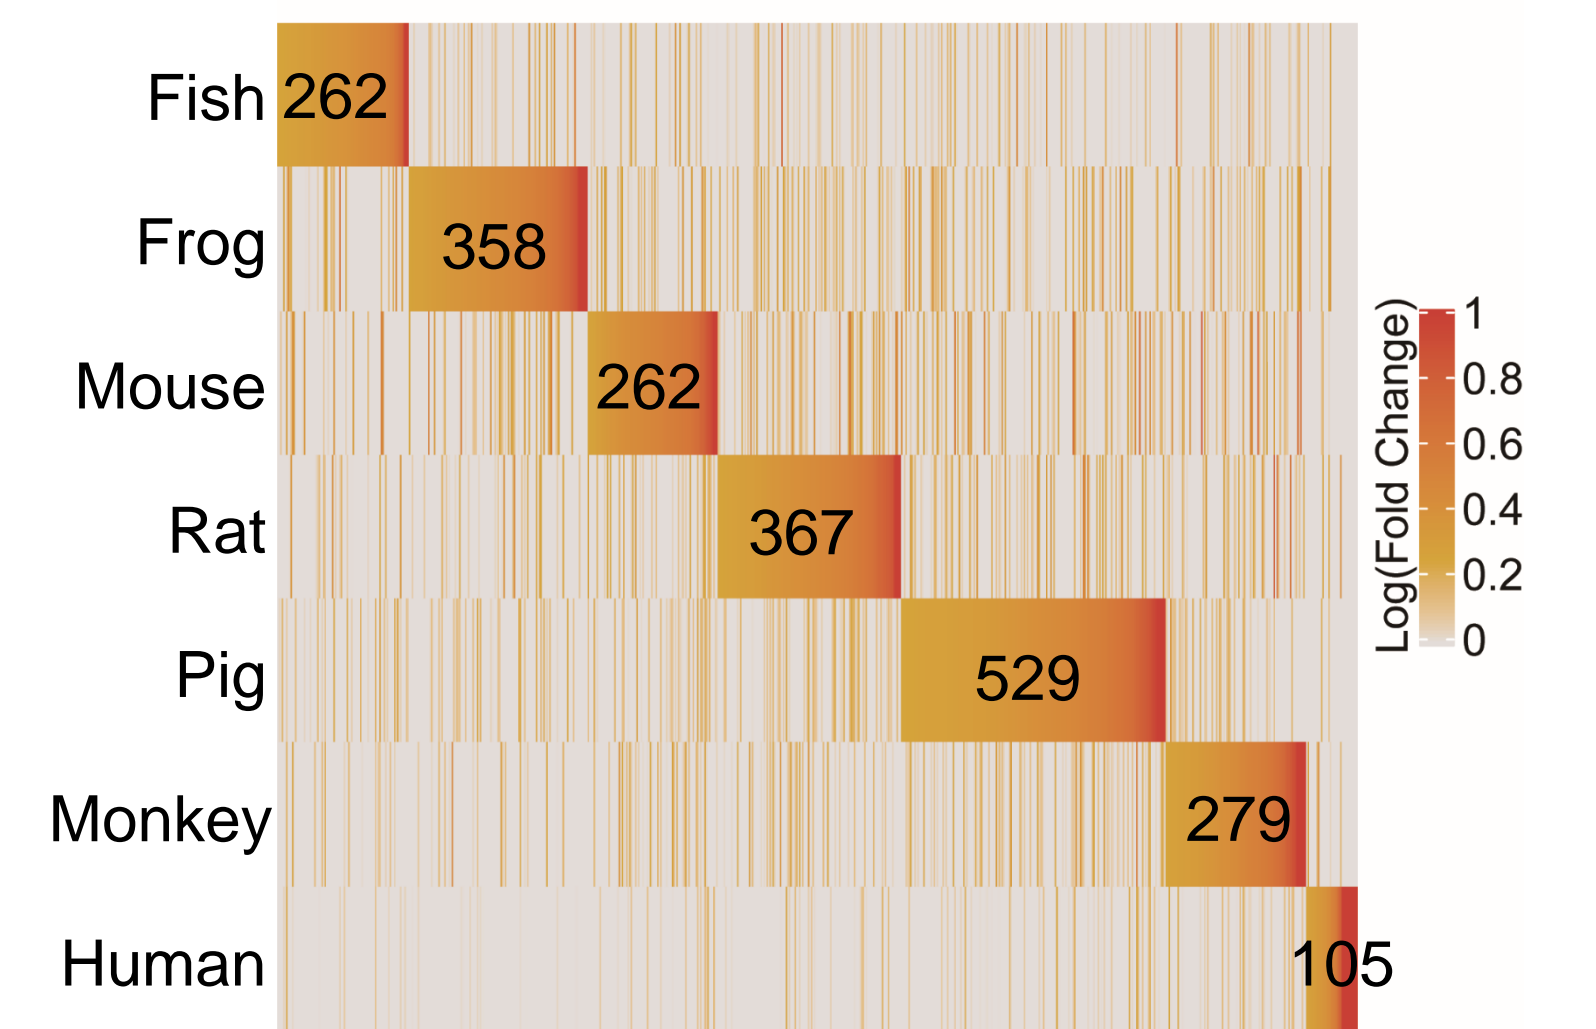

D

Plasma B cell upregulated genes

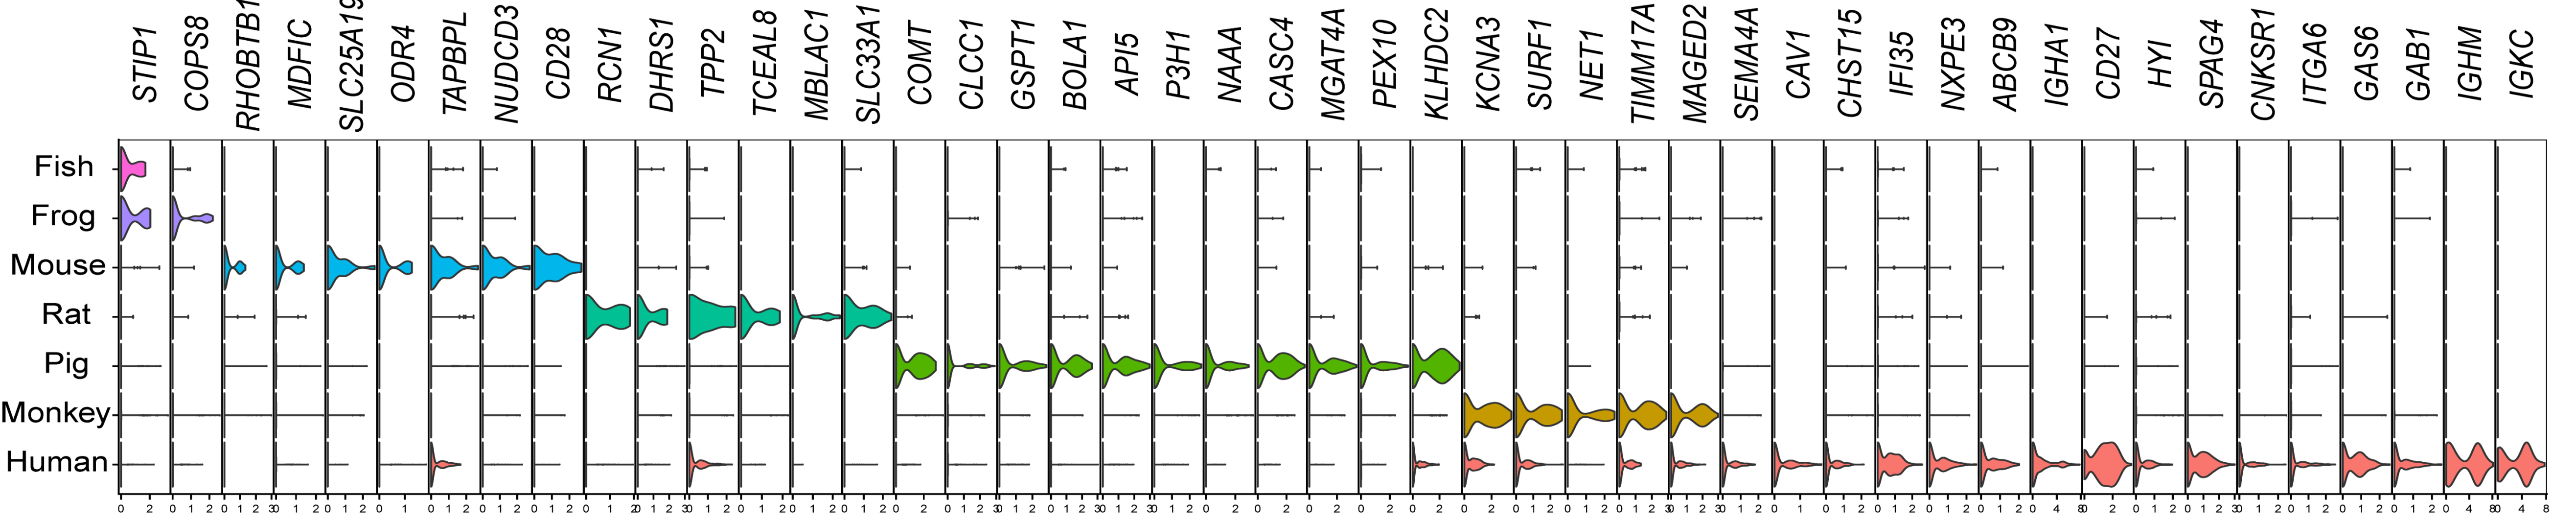

E

Species top20 genes

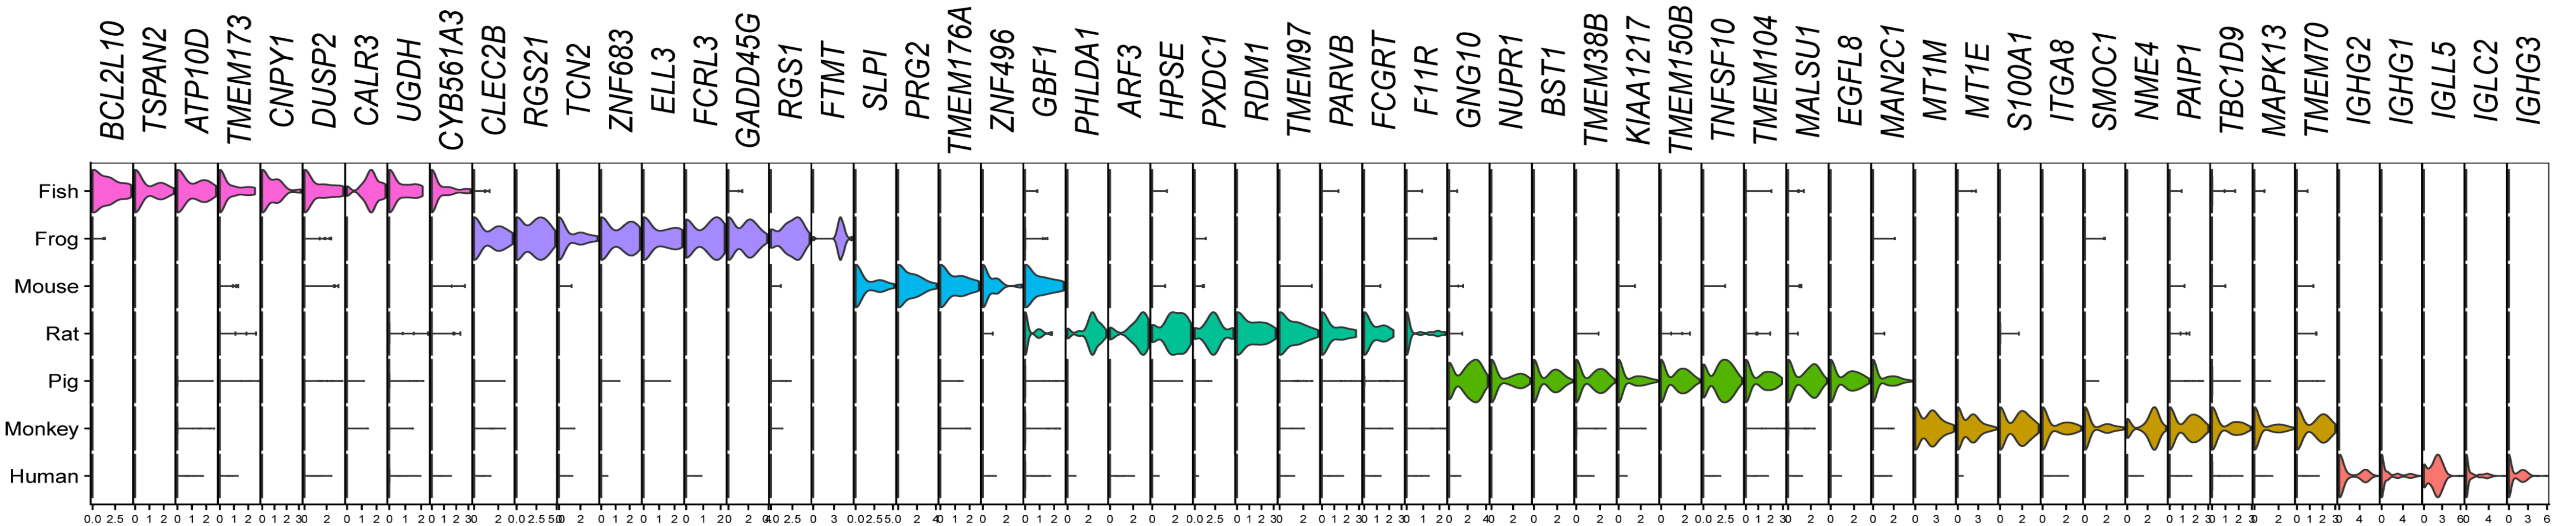

A

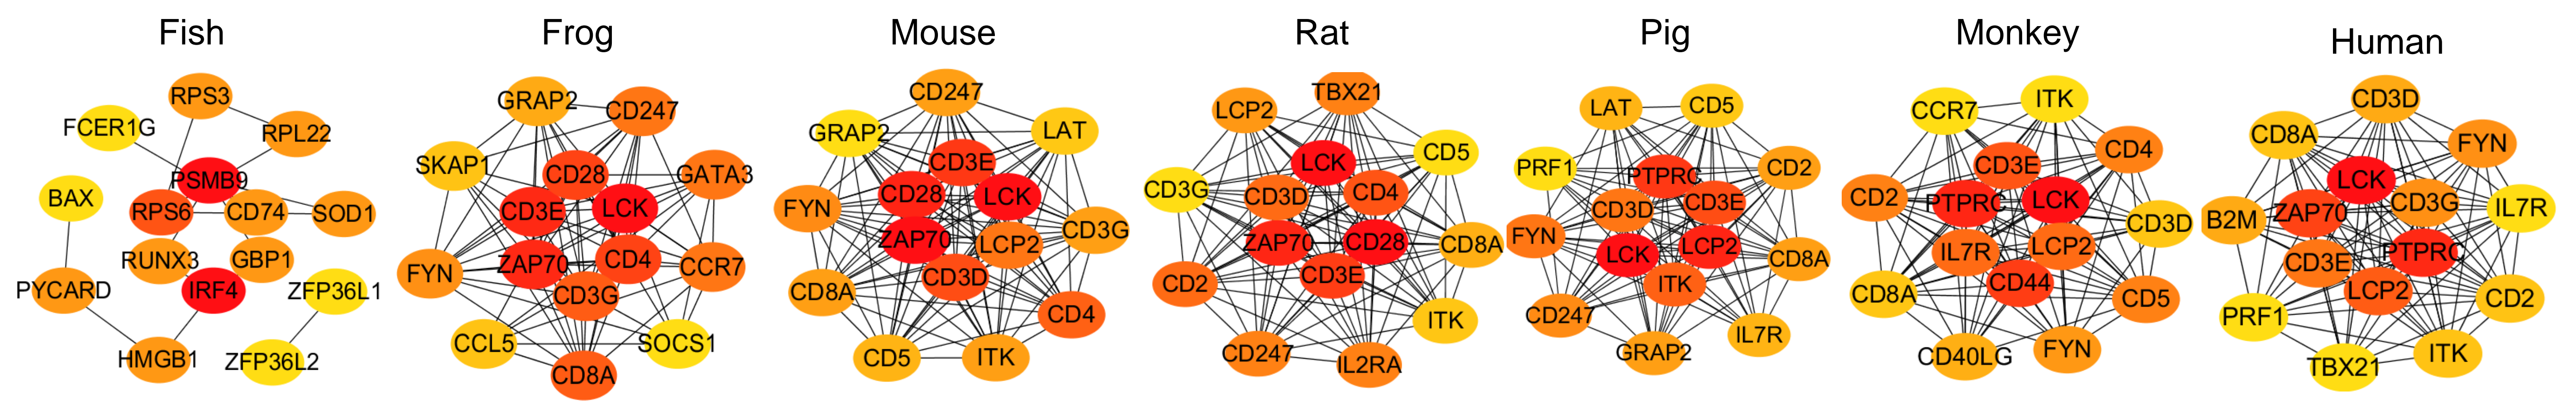

B

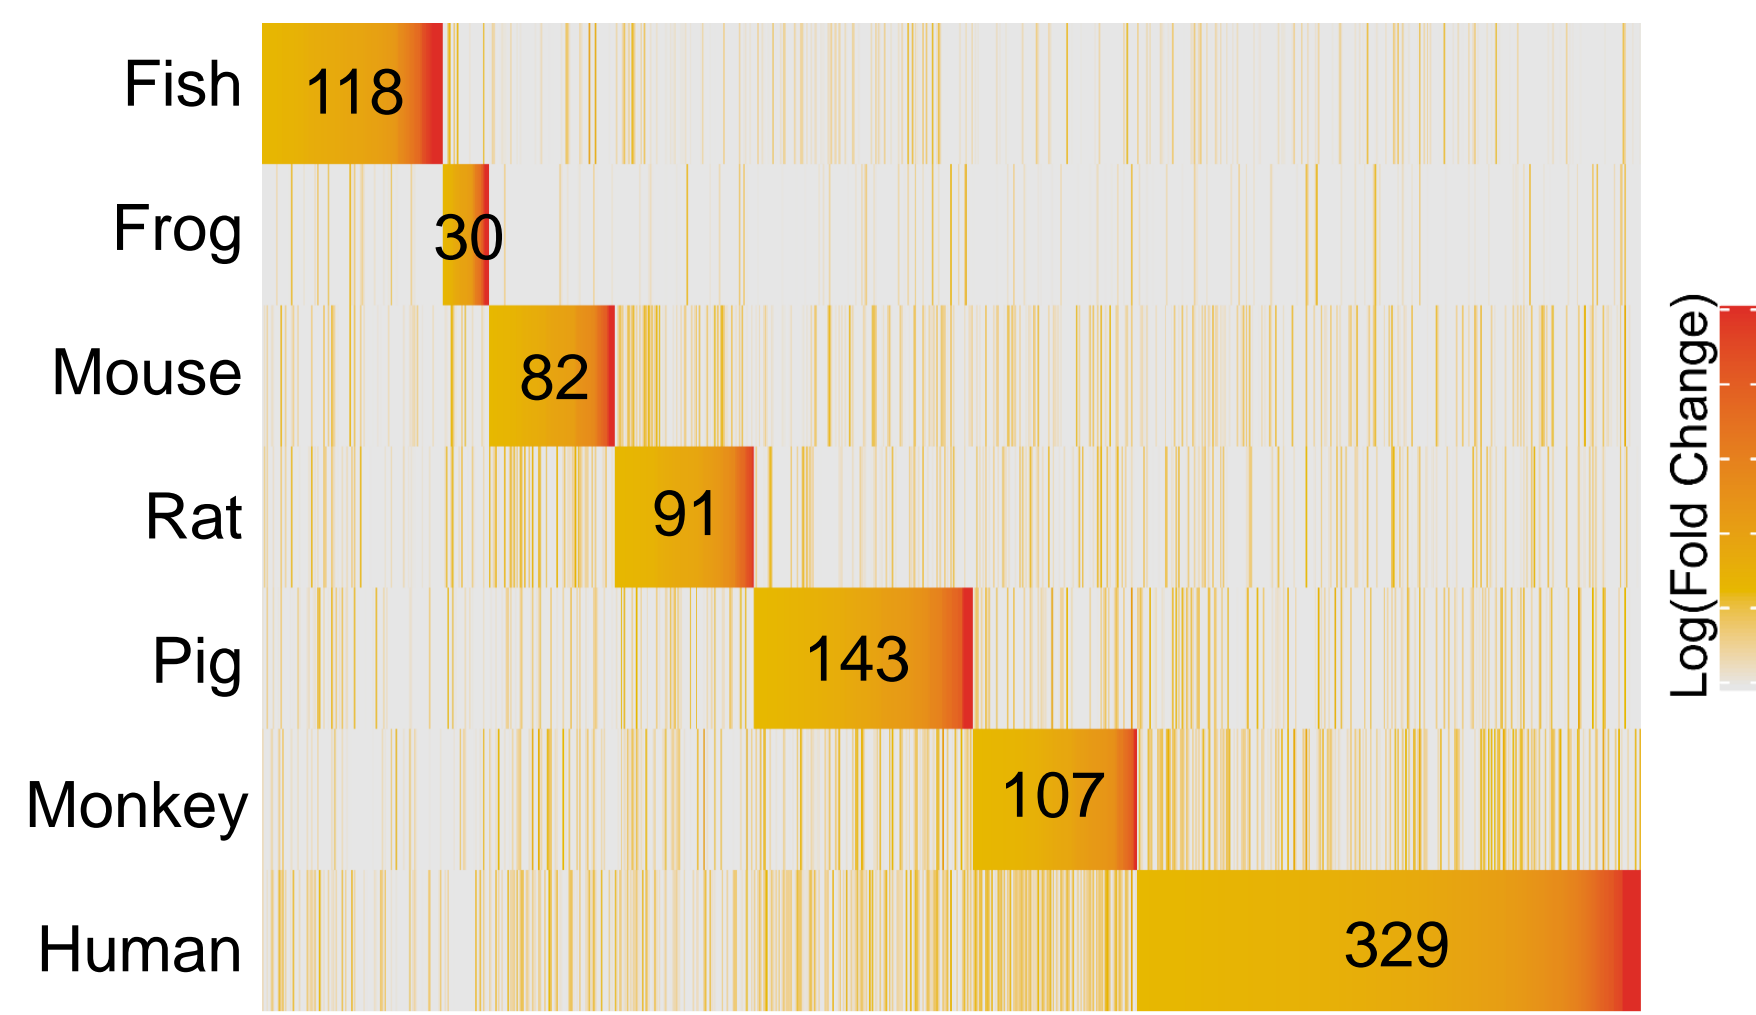

A

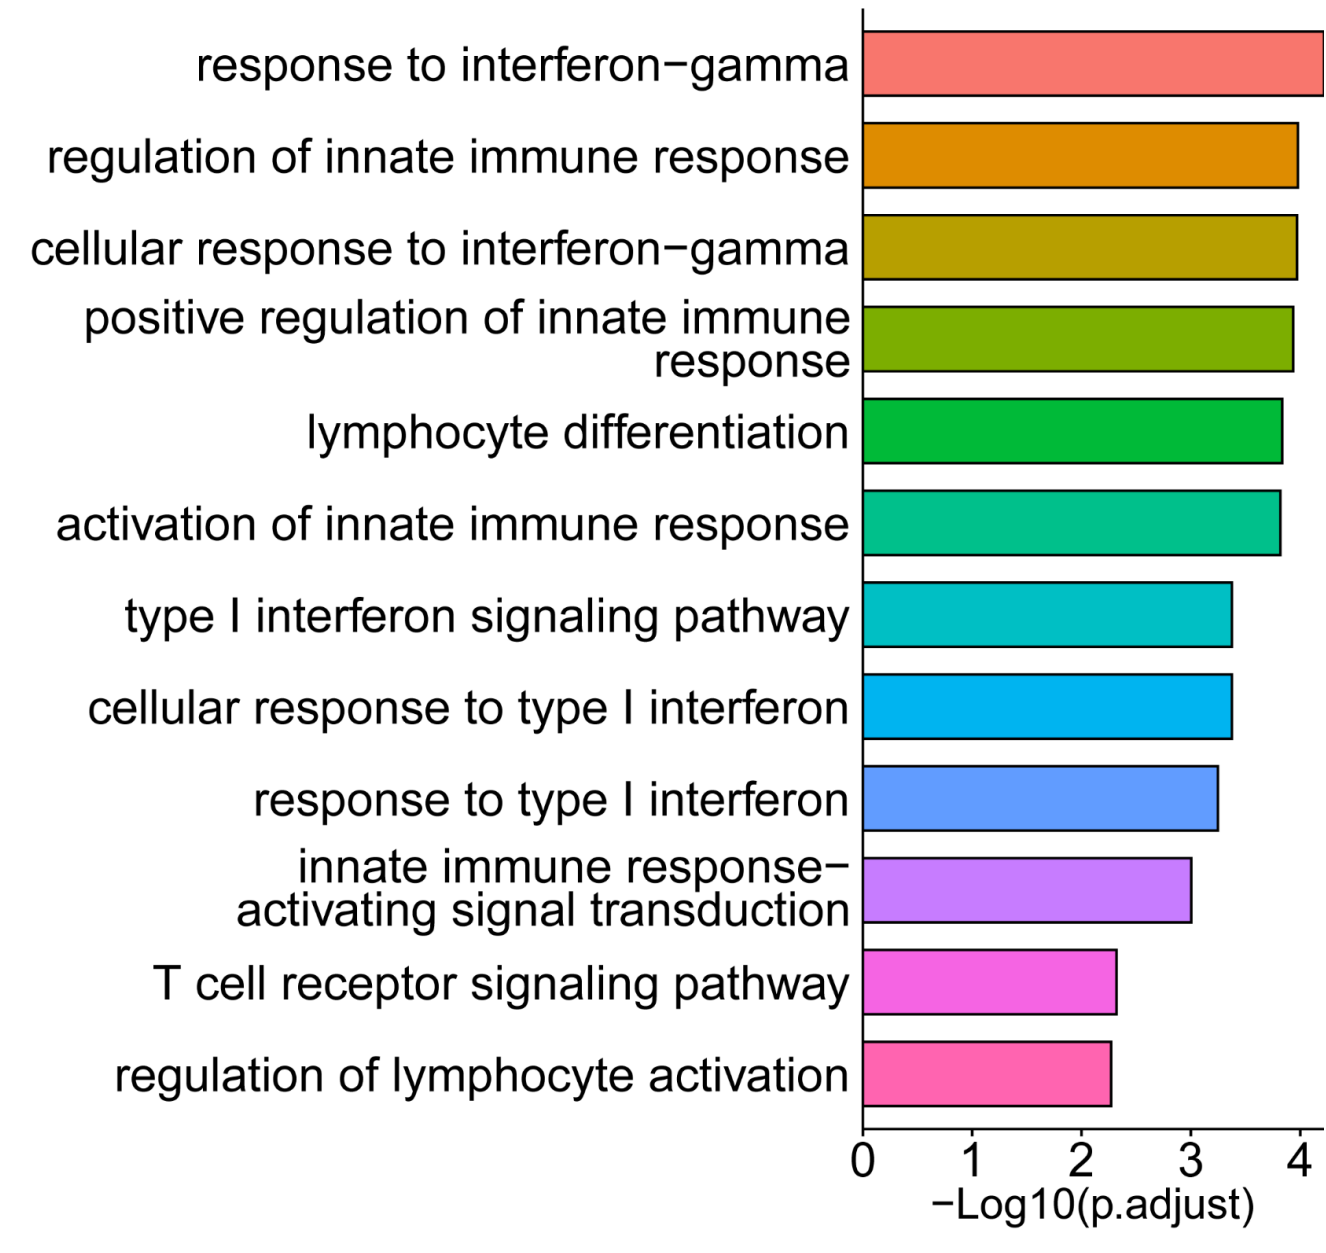

B

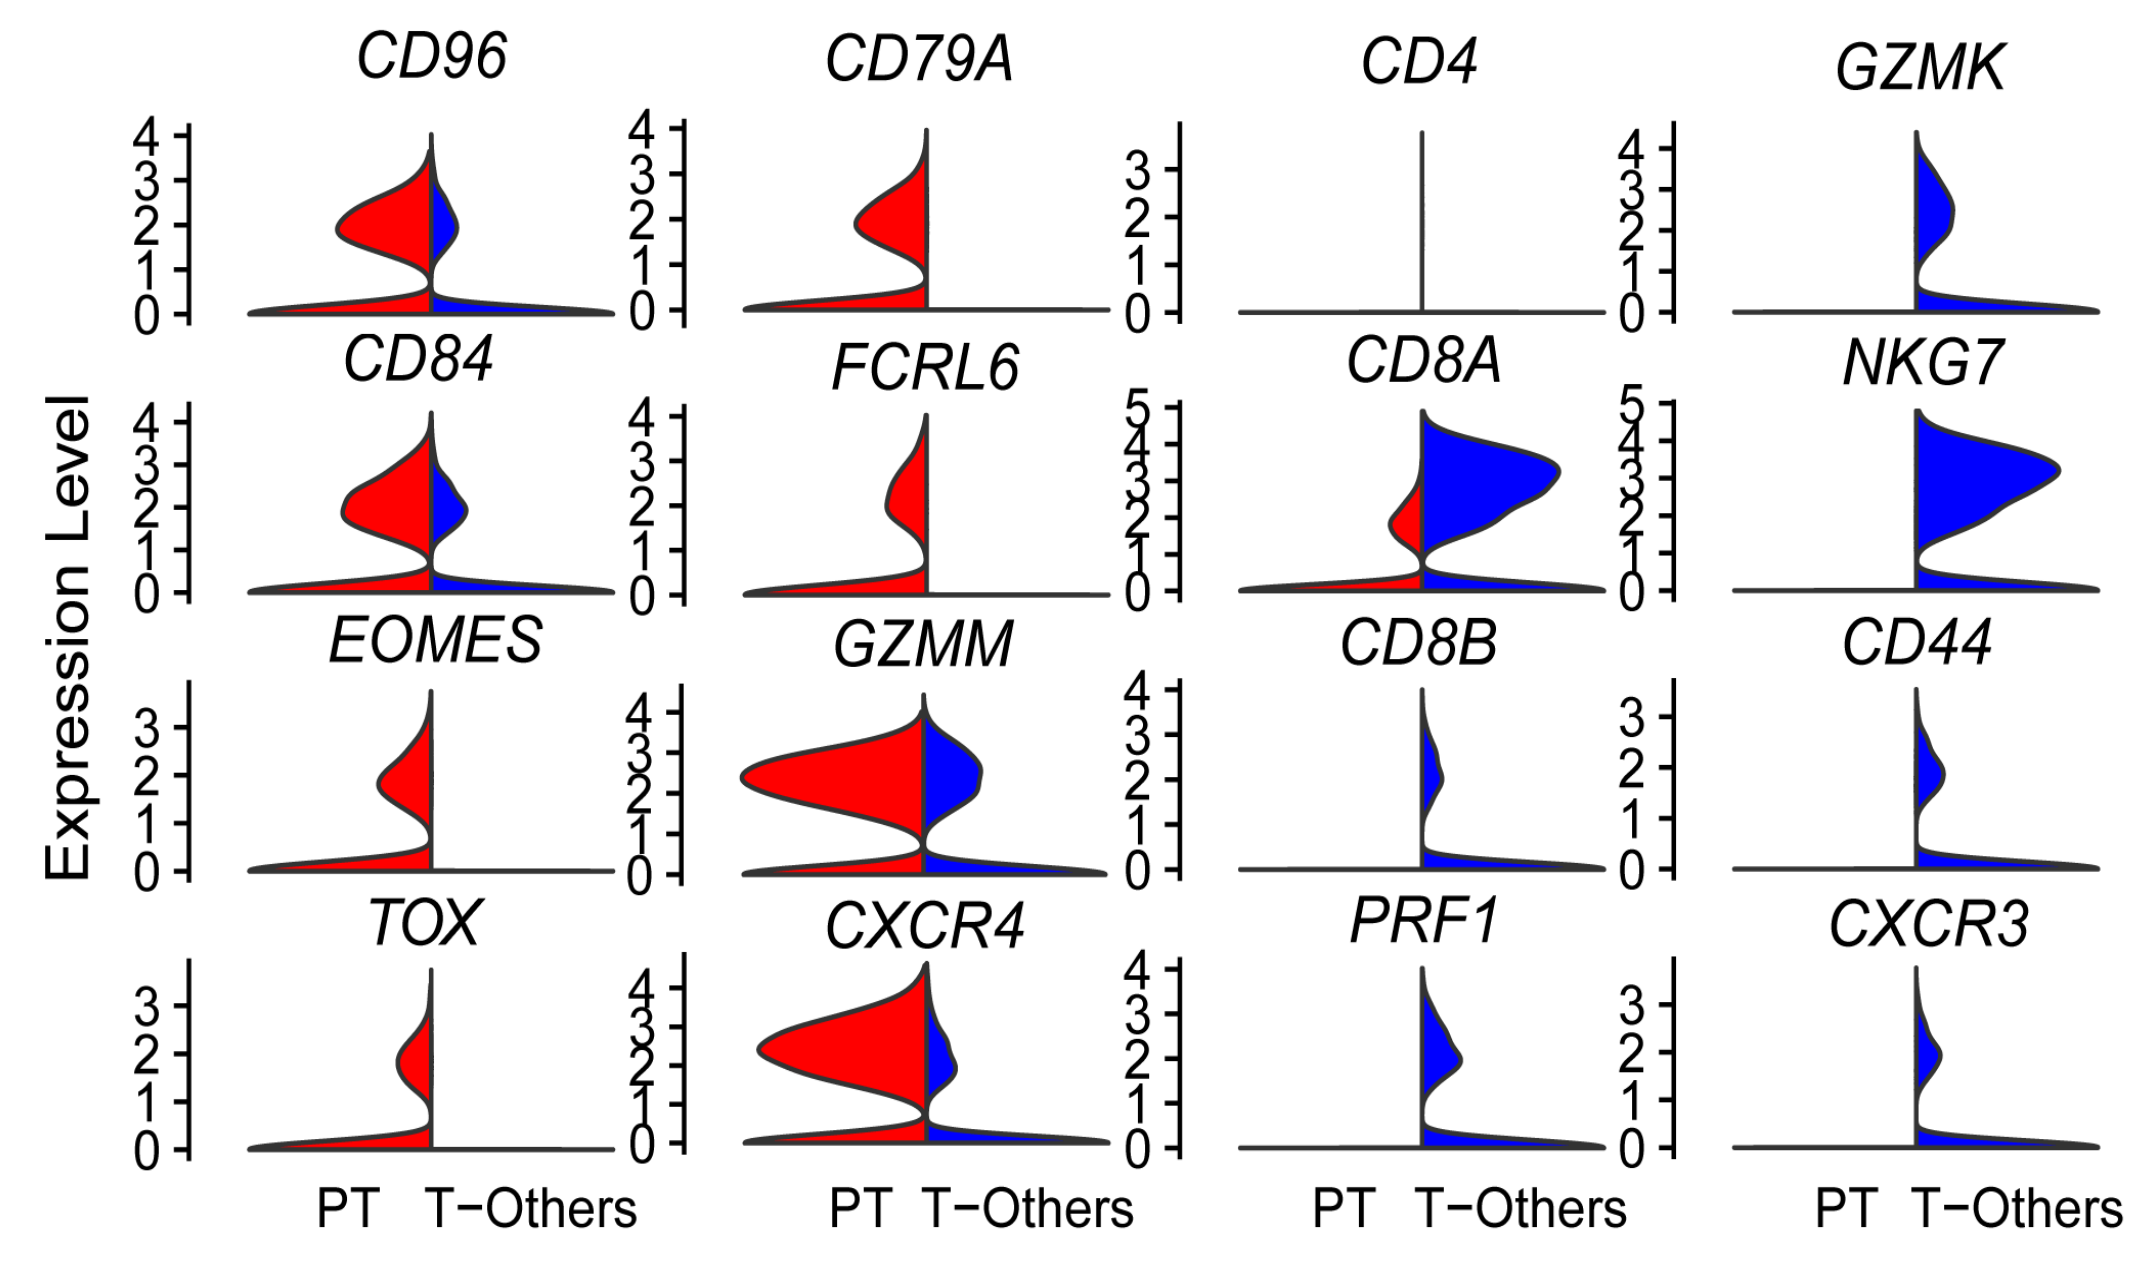

A

Transcription factors

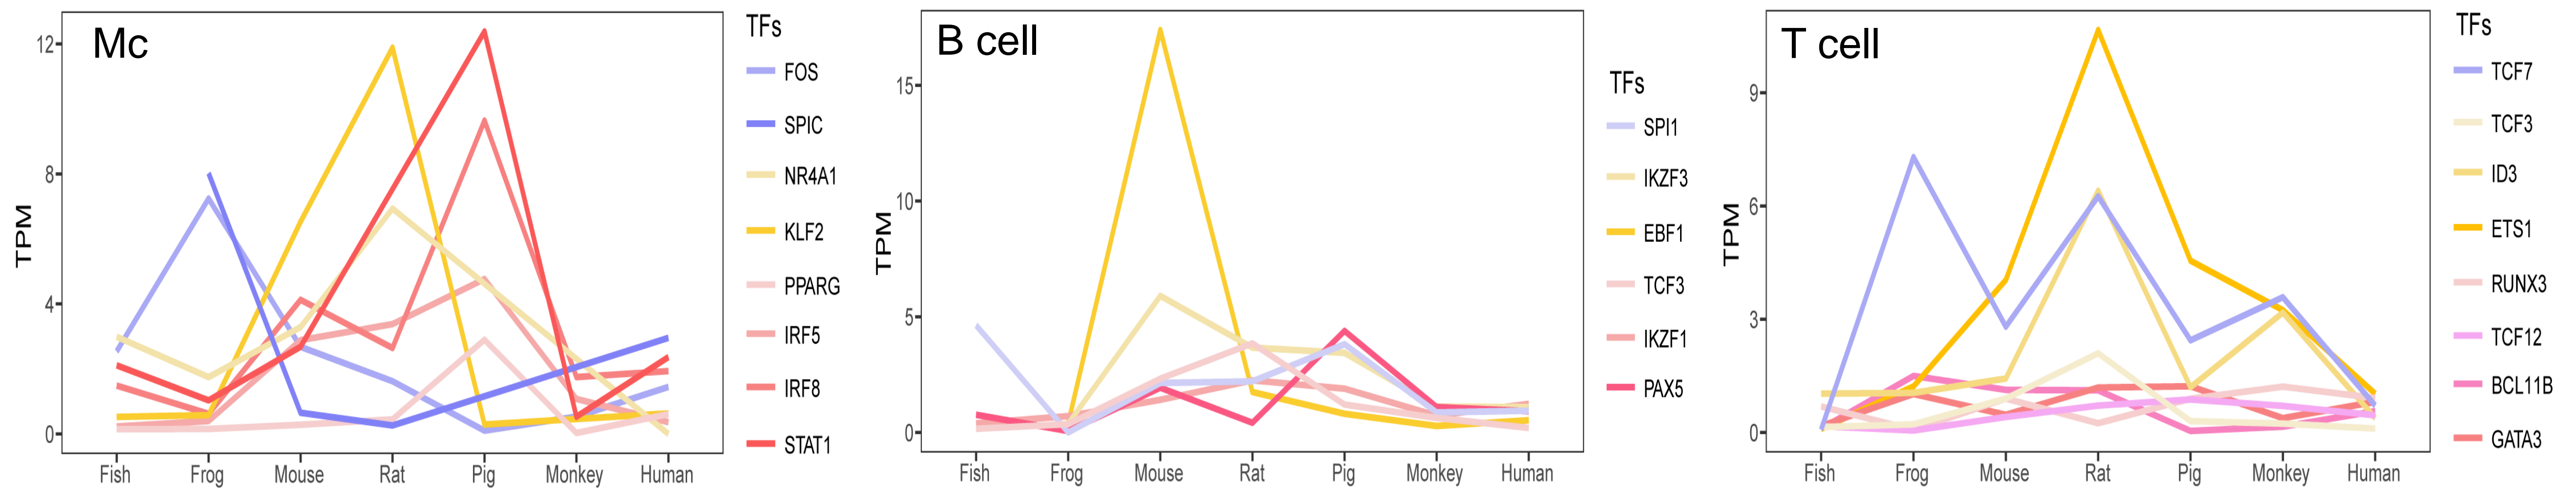

B

Gene expression patterns

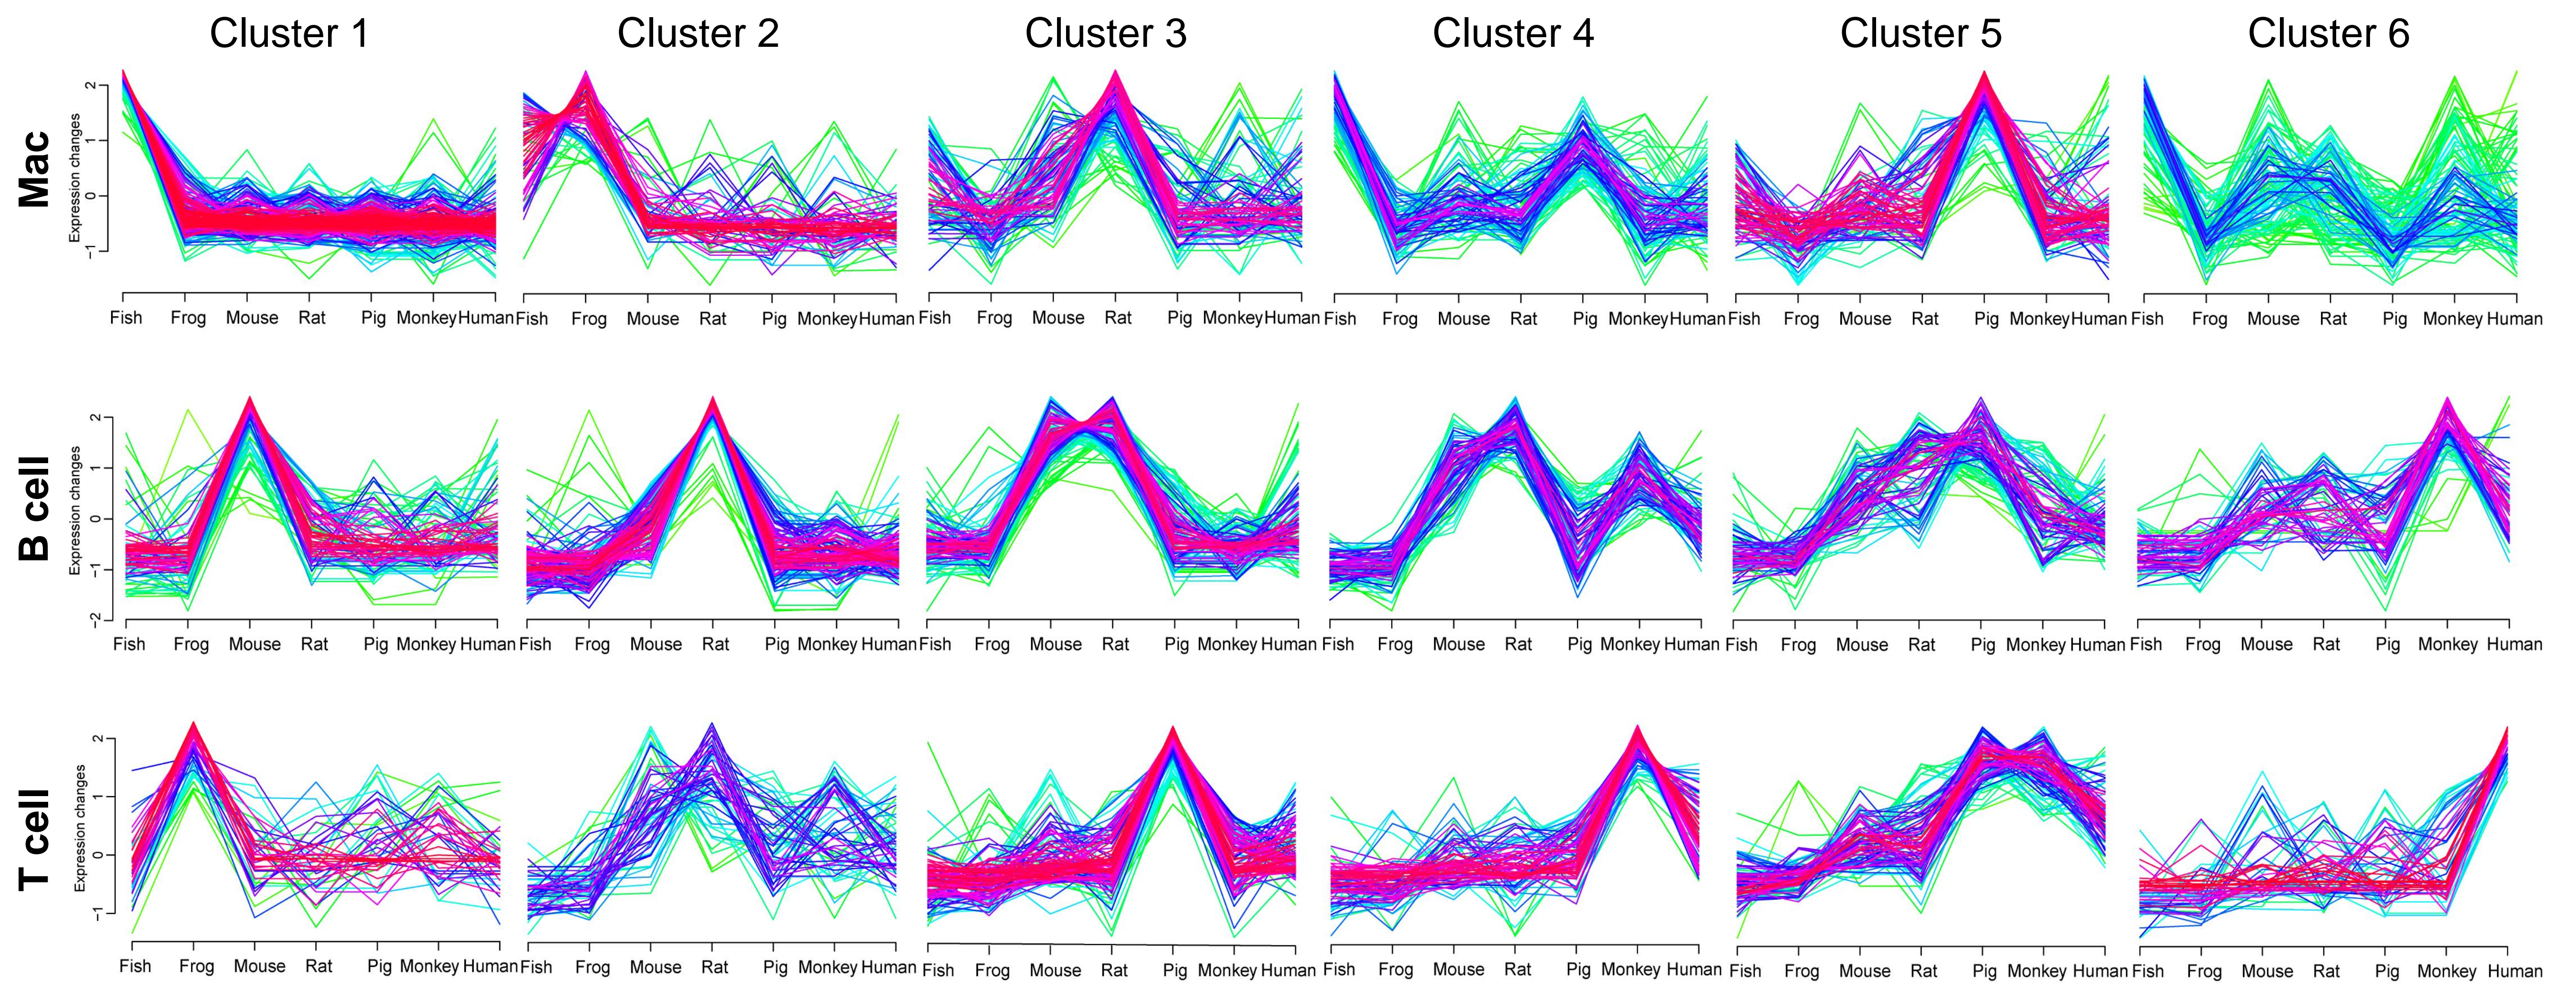

Supplement: mmc1.pdf [file mmc1.pdf]
